# Supplementary material
Source: publisher figshare collection journal article supplement (https://brill.figshare.com/articles/dataset/_/11688558)
Supplement: Supplementary file 1 [file 1]

## Appendix 1 Lexicon

100 word–Swadesh list comparison of 13 Arabic dialects and Classical Arabic

Notes: Numerals in the data columns indicated non–attestation in the sources. These are numbered in sequence to facilitate counting the gaps. The row at the bottom labeled pos (possible) indicates the actual number of items attested the sources, with subtraction of non–attested items.

### 1.1 Data

|   |           | CA                       | Mor                                 | Mlt        | Cai                          | Dms                     | Irq                     | Skh                           | AqArb                    | Cyp                             | Glif               | Ymn                          | Nig                              | Bux     | Nub                            |
|---|-----------|--------------------------|-------------------------------------|------------|------------------------------|-------------------------|-------------------------|-------------------------------|--------------------------|---------------------------------|--------------------|------------------------------|----------------------------------|---------|--------------------------------|
| 1 | ALL       | kull                     | koll                                | Koll<br>u  | kull                         | kəll                    | kull                    | tʃill                         | kəll,<br>sa:ʔi:<br>n     | kull                            | kil                | kull                         | tʃat                             | kullu   | kulu                           |
| 2 | ASH       | ra<br>ma:<br>d           | r <sup>ʕ</sup> m<br>ad <sup>ʕ</sup> | rmi:<br>d  | ram<br>a:d <sup>ʕ</sup><br>* | rama<br>:d              | ruma<br>:d              | 1                             | r <sup>ʕ</sup> am<br>a:d | rama<br>t<br>r–m–<br>d          | rama<br>ad         | 1                            | 1                                | ra'matt | ruman                          |
| 3 | BAR<br>K  | qirf<br>at               | qeʃ<br>r <sup>ʕ</sup> a             | ʔoʃr<br>a  | ʔiʃr*                        | ʔəʃər                   | giʃra                   | kiʃr                          | səvi:y<br>e              | 1                               | giʃra              | giʃr                         | li:he,<br>girfe                  | 1       | *kokobo<br>lataka,<br>(girifa) |
| 4 | BEL<br>LY | bat <sup>ʕ</sup><br>n    | ker<br>ʃ                            | zaʔʔ       | bat <sup>ʕ</sup><br>n*       | bat <sup>ʕ</sup> ə<br>n | bat <sup>ʕ</sup> i<br>n | bat <sup>ʕ</sup> n<br>, tʃarʃ | dʒoof                    | patn<br>b–t <sup>ʕ</sup> –<br>n | bat <sup>ʕ</sup> n | bat <sup>ʕ</sup> n<br>, karʃ | kirʃ                             | batin   | batna                          |
| 5 | BIG       | kab<br>i:r               | kbi<br>r                            | kibi<br>r  | kibii<br>r                   | kbi:r                   | tʃbi:r                  | tʃabi:<br>r                   | gəbi:<br>r               | k–b–<br>r                       | ʃood               | Kabii<br>r                   | kabi:r                           | ka'biir | kbir                           |
| 6 | BIR<br>D  | t <sup>ʕ</sup> a:<br>ʔir | t <sup>ʕ</sup> ir                   | ʃasf<br>ur | t <sup>ʕ</sup> ee<br>r*      | t <sup>ʕ</sup> eer      | t <sup>ʕ</sup> eer      | t <sup>ʕ</sup> eer            | ku:tʃ<br>ka:ye           | 2                               | t <sup>ʕ</sup> eer | t <sup>ʕ</sup> ajr           | t <sup>ʕ</sup> e:ra              | tayra   | ter                            |
| 7 | BITE      | ʃad                      | ʃed                                 | gide       | ʃad <sup>ʕ</sup>             | ʃad <sup>ʕ</sup> d      | ʃað <sup>ʕ</sup> ð      | ʃað <sup>ʕ</sup> ð            | 1                        | ʃaðð                            | ʃad <sup>ʕ</sup> d | lugus                        | ad <sup>ʕ</sup> d <sup>ʕ</sup> a | yaʃazz  | adi                            |

|        |                 |                  |                 |            |             |             |             |                       |            |                           |                      |               |                      |                 |              |
|--------|-----------------|------------------|-----------------|------------|-------------|-------------|-------------|-----------------------|------------|---------------------------|----------------------|---------------|----------------------|-----------------|--------------|
|        |                 | ʕdʕa             | ʕdʕ             | m          | dʕ          | ʕ           | ʕ           | ʕ                     |            | ʕ-dʕ-<br>dʕ               | ʕ                    | ʕ             |                      |                 |              |
| 8      | BLA<br>CK       | ʔas<br>wa<br>d   | kʰe<br>l        | iswe<br>d  | iswi<br>d   | ʔasw<br>ad  | ʔasw<br>ad  | ʔasw<br>ad            | əswə<br>d  | isfet<br>s-w-<br>d        | ʔasw<br>ad           | ʔasw<br>ad    | axadʕar              | ʔaswad          | *asue        |
| 9      | BLO<br>OD       | da<br>m          | de<br>mm        | dem<br>m   | dam<br>m    | dam<br>m    | dam<br>m    | dam                   | Dam        | d-m-<br>y                 | dam<br>m             | Dam           | damm                 | dam             | dum          |
| 1<br>0 | BO<br>NE        | ʕað<br>ʕm        | ʕdʕ<br>em       | ʕad<br>ma  | ʕad<br>ma   | ʕadʕ<br>me  | ʕaðʕ<br>ma  | ʕaðʕ<br>m             | ʕadʕə<br>m | 3                         | ʕaðʕ<br>m            | ʕaðʕ<br>ma    | adʕum                | ʕazəm           | ladim        |
| 1<br>1 | BRE<br>AST      | sʕa<br>dr        | bez<br>zul<br>a | Side<br>r  | sidir<br>*  | sʕədʕ<br>ər | nahid       | θidi<br>(f.)<br>sʕidr | 2          | pzaz<br>9pl)<br>b-z-<br>z | deed<br>(f)<br>sʕadr | sʕadr         | de:d                 | sadər;bu<br>ʒul | *sudur       |
| 1<br>2 | BUR<br>N(V<br>T | ħar<br>aqa       | ħre<br>q        | ħar<br>aʔ  | ħar<br>aʔ   | ħaraʔ       | ħirag       | ħarak                 | ħ-r-<br>q  | ħ-r-<br>q                 | ħara<br>g            | ħara<br>g     | hirig,<br>taʃʃa (tr) | ʕalag           | haragu       |
| 1<br>3 | CLA<br>W        | ðʕu<br>fr        | dʕfe<br>rʕ      | Dife<br>r  | dʕifr<br>ʕ* | dʕəfə<br>r  | ðʕifir      | iðʕfir                | dʕəfə<br>r | ðʕ-f-<br>r                | mixla<br>b,<br>ðʕifr | θʕufri<br>n** | xumfur               | 2               | *dufuru      |
| 1<br>4 | CLO<br>UD       | ɣam<br>a:m<br>at | ɣm<br>am<br>a   | sħa<br>ba  | saħ<br>aab  | yeem<br>e   | yeem<br>a   | yeem<br>i             | 3          | ɣ-y-r                     | siħaa<br>b,<br>yeem  | 2             | dʕa(ha)w<br>ije      | yeem,qe<br>em   | *soobur<br>a |
| 1<br>5 | COL<br>D        | ba:<br>rid       | bar<br>ed       | bi:r<br>ed | bar<br>d    | barəd       | bard<br>a:n | bi:rid                | beerə<br>d | *pere<br>t<br>(brd)       | baari<br>d           | baari<br>d    | barda:n              | bard            | bari         |
| 1<br>6 | CO<br>ME        | dʒa:<br>ʔa       | ʒa              | dʒi:       | ga          | ʔədʒa       | dʒa:        | atsa                  | dʒa:       | dʒ-y-<br>y                | dʒa                  | dʒaaʔ         | dʒa                  | dʒakki          | dʒa          |

|    |                        |             |           |            |             |             |            |                |                          |                     |                       |             |        |       |         |
|----|------------------------|-------------|-----------|------------|-------------|-------------|------------|----------------|--------------------------|---------------------|-----------------------|-------------|--------|-------|---------|
| 17 | DIE                    | ma:ta       | mat       | mi:t       | maat        | ma:t        | ma:t       | ma:t           | ma:t                     | m-w-t               | maat                  | maat        | ma:t   | maat  | mutu    |
| 18 | DOG                    | kalb        | kelb      | kelb       | kalb        | kalb        | tʃalib     | tʃalb          | kalb                     | k-l-b               | tʃalb                 | kalb        | kalb   | kalb  | keli    |
| 19 | DRI<br>NK              | ʃari<br>ba  | ʃre<br>b  | ʃoro<br>b  | ʃirib       | ʃəreb       | ʃirab      | iʃrib          | ʃərəb                    | ʃ-r-b               | ʃarab                 | ʃirib       | ʃarab  | ʃarab | ‘aʃrubu |
| 20 | DRY                    | ja:b<br>is  | jab<br>es | ni:ʃ<br>ef | na:ʃ<br>if* | na:ʃe<br>f  | na:ʃif     | ji:bis         | jeebəs                   | neʃef<br>dʒ-f-<br>y | jaabi<br>s/na<br>aʃif | jaabi<br>s  | ja:bis | yabs  | abis    |
| 21 | EAR                    | ʔuð<br>n    | wd<br>en  | wid<br>na  | wid<br>n    | ʔədən       | ʔiðin      | iðn            | ədən                     | iðn<br>ʔ-ð-<br>n    | iðin                  | ʔiðn        | dʻan   | ʔizən | a’dan   |
| 22 | EAR<br>TH,<br>DIR<br>T | tur<br>a:b  | trʻa<br>b | trab       | ardʻ        | tʻrʻa:<br>b | tra:b      | arðʻ,<br>turbi | ardʻ                     | trap<br>t-r-b       | traab                 | arðʻ        | ardʻ   | tiin  | tura    |
| 23 | EAT                    | ʔak<br>ala  | kla       | ki:l       | akal        | ʔakal       | ʔakal      | atʃal          | akal                     | ʔ-k-l               | ʔakal                 | ʔakal       | akal   | ʔukul | ‘akulu  |
| 24 | EGG                    | bai<br>dʻat | bidʻ<br>a | Bajd<br>a  | bee<br>dʻa  | beedʻ<br>a  | beeðʻ<br>a | beeðʻ<br>a     | bajdʻ<br>a               | b-y-<br>dʻ          | beedʻ<br>a            | bajðʻ<br>ah | be:dʻe | bayda | ma’jai  |
| 25 | EYE                    | ʃai<br>n    | ʃej<br>n  | ʃajn       | ʃee<br>n    | ʃeen        | ʃeen       | ʃeen           | ʃajn                     | ʃayn<br>ʃ-y-<br>n   | ʃeen                  | ʃajn        | e:n    | ʔayn  | ‘ena    |
| 26 | FAT<br>,N.             | ʃaħ<br>m    | ʃhe<br>m  | ʃaħ<br>am  | ʃaħ<br>m    | ʃaħə<br>m   | ʃaħa<br>m  | ʃaħm           | samə<br>n,<br>ʃuma<br>:n | s-m-<br>n           | dihin                 | 3           | ʃahama | duhun | dikin   |

|    |             |                 |                |            |             |               |                             |                             |              |                    |               |                        |                  |         |                                 |
|----|-------------|-----------------|----------------|------------|-------------|---------------|-----------------------------|-----------------------------|--------------|--------------------|---------------|------------------------|------------------|---------|---------------------------------|
| 27 | FEATHER     | ri:f<br>at      | ri:fa          | ri:fa      | ri:fa<br>*  | ri:fe         | ri:fa                       | ri:fi                       | 4            | 4                  | rii:fa        | ri:fəh                 | su:fa            | 3       | *suu-<br>teri (hair<br>of bird) |
| 28 | FIRE        | na:<br>r        | ʕafj<br>a      | nar        | na:r        | nʕa:rʕ        | na:r                        | na:rʕ                       | na:rʕ        | w-q-<br>d          | dʕaw,<br>naar | naar                   | na:r             | naar    | nari                            |
| 29 | FISH        | sa<br>ma<br>k   | ħut            | ħut<br>a   | sam<br>ak   | (sam<br>ak?)  | (simi<br>c?)                | sama<br>tʃi                 | sama<br>k    | 5                  | sima<br>tʃ    | ħuut                   | samaka<br>ħu:tʕa | samak   | samaga                          |
| 30 | FLY         | tʕa:<br>ra      | tʕar           | tar        | tʕa:r<br>ʕ  | tʕa:r         | tʕa:r                       | tʕa:r                       | tʕ-y-<br>r   | 6                  | tʕaar         | tʕa:r                  | tʕa:r            | nat'taa | 1                               |
| 31 | FOOT        | riɖʒ<br>l       | rʒel           | si:ʔ       | rigl        | rəɖʒəl        | riɖʒil                      | (r)itsl                     | əɖʒər        | izr                | riil          | riɖʒl                  | riɖʒil           | riɖʒil  | kura                            |
| 32 | FULL        | mal<br>ʔa:n     | ʕa<br>me<br>r  | mi<br>mli  | malj<br>aan | mal(j)<br>a:n | malja:<br>n,<br>matru:<br>s | malja:<br>n<br>madm<br>u:ts | əmmal<br>a   | mpla<br>n<br>m-l-' | matru<br>us   | matru:<br>s            | malʔan           | 4       | mal'jan                         |
| 33 | GIVE        | ʔaʕt<br>ʕa:     | ʕtʕa           | ta         | idda        | ʕatʕa         | nitʕa                       | intʕa                       | ʕatʕa        | ʕ-tʕ-<br>y         | ʕatʕa         | ʔadd<br>a              | tʕaʔan           | an'taa  | we'di                           |
| 34 | GOOD<br>adj | tʕajj<br>ib     | me<br>zja<br>n | Tajj<br>eb | kwa<br>jjis | mni:<br>ħ     | zeen,<br>xoos               | mali:<br>ħ                  | kəwa<br>jjəs | k-y-<br>s          | zeen          | tʕajji<br>b,<br>naaħiy | sa/eme           | zeen    | kweis                           |
| 35 | GREEN       | ʔax<br>dʕa<br>r | xdʕ<br>er      | aħd<br>ar  | ʔax<br>dʕar | ʔaxdʕ<br>ar   | ʔaxðʕ<br>ar                 | ʔaxðʕ<br>ar                 | axdʕa<br>r   | x-<br>dʕ-r         | ʔaxdʕ<br>ar   | ʔaxðʕ<br>ar            | axadʕar          | ʔaxzar  | *manjan                         |
| 36 | HAIR        | ʃaʕr            | ʃer            | ʃaʕa<br>r  | ʃaʕr        | ʃaʕər         | ʃaʕra                       | ʃaʕra                       | 5            | ʃaxve<br>ʃ-ʃ-f     | ʃaʕar         | ʃaʕra                  | ʃiʔir            | ʃar'ʕas | su                              |
| 3  | HA          | jad             | idd            | id         | i:d         | ʔi:d          | ʔi:d                        | eed                         | i:d          | it                 | yad           | yad                    | i:d              | yad     | ida                             |

|    |       |         |       |         |            |          |         |          |        |       |             |            |        |        |         |
|----|-------|---------|-------|---------|------------|----------|---------|----------|--------|-------|-------------|------------|--------|--------|---------|
| 7  | ND    |         |       |         |            |          |         |          |        | y-d   |             |            |        |        |         |
| 38 | HEAD  | raʔs    | rʕasʕ | ras     | rʕaas      | ra:s     | ra:s    | rʕa:s    | rʕa:s  | m-x-x | raas        | raʔs       | ra:s   | raaʃ   | ras     |
| 39 | HEAR  | samiʃa  | smeeʃ | samaʕ   | simiʃ      | səmeʃ    | simaʃ   | ismiʃ    | səməʃ  | s-m-ʃ | simaʃ       | simiʃ*     | simi   | samaʃ  | ʕasma   |
| 40 | HEART | qalb    | qelb  | ʔalb    | ʔalb       | ʔalb     | qalb    | kalʕb    | fa:d   | kilep | galb        | galb       | galib  | qalb   | gelba   |
| 41 | HORN  | qarn    | qerʕn | ʔarn    | ʔarn       | ʔarən    | girin   | girin    | 6      | korne | garn        | garn*      | garn   | ʃɔx    | *gurun  |
| 42 | I     | ʔana:   | ana   | ji:n    | ana        | ʔana     | ʔa:ni   | ana      | ana    | ʔ-n-a | ana         | ʔana       | ana    | anaa   | ʕana    |
| 43 | KILL  | qatala  | qtel  | ʔateɪ   | mawwit     | ʔatal    | kital   | katal    | qatal  | q-t-l | gital       | gatal      | katal  | qaʕtal | katul   |
| 44 | KNEE  | rukbat  | rokba | rko bba | rukba*     | rəkbə    | rukba   | rʕutʃbi  | 7      | 7     | rikba       | rukbi h*   | rukuba | 5      | *rukuba |
| 45 | KNOW  | ʃarafa  | ʃrʕef | jaf     | ʃirif      | ʃəref    | ʃiraf   | ʃarʕaf   | ʃərəf  | ʃ-r-f | ʃaraf, dara | diri ʃaraf | ʃirif  | ʔaraf  | ʕarufu  |
| 46 | LEAF  | waraqat | werqa | werʔa   | warʔa*     | waraʔa   | warga   | warka    | waraqa | 8     | wriga       | waragih*   | waraga | varaq  | korofo  |
| 47 | LIE   | raqada  | ttmed | mte dd  | itmad dad* | tlaʔʔa h | tmaddad | ttsallas | 8      | 9     | tamad dad   | ragad*     | ragad  | daaʃa  | 2       |
| 4  | LIVER | kab     | keb   | fwi:    | kib        | kəbə     | kabd    | 2        | 9      | q-sʕ- | tʃibd       | kabdi      | kibde  | kabda  | *koobda |

|    |          |                          |                            |                  |                          |                          |                          |                          |                         |                         |                          |                          |                     |                    |           |
|----|----------|--------------------------|----------------------------|------------------|--------------------------|--------------------------|--------------------------|--------------------------|-------------------------|-------------------------|--------------------------|--------------------------|---------------------|--------------------|-----------|
| 8  |          | id                       | da                         | d                | da*                      | d                        | a                        |                          |                         | b                       |                          | h*                       |                     |                    |           |
| 49 | LONG     | t <sup>ʰ</sup> a<br>wi:l | t <sup>ʰ</sup> wi<br>l     | twil             | t <sup>ʰ</sup> aw<br>i:l | t <sup>ʰ</sup> awi:<br>l | t <sup>ʰ</sup> uwi:<br>l | t <sup>ʰ</sup> awi:<br>l | t <sup>ʰ</sup> -w-<br>l | t <sup>ʰ</sup> -w-<br>l | t <sup>ʰ</sup> awii<br>l | t <sup>ʰ</sup> awi:<br>l | t <sup>ʰ</sup> awil | ta'viil            | towil     |
| 50 | LOUSE    | qa<br>mla<br>h           | qe<br>mla                  | ʔam<br>la        | ʔam<br>la*               | ʔaml<br>e                | gaml <sup>ʰ</sup><br>a   | kaml <sup>ʰ</sup>        | 10                      | q-m-<br>l               | gaml<br>a                | gaml<br>eh               | 2                   | qamla              | 3         |
| 51 | MAN      | ra<br>dzu<br>l           | r <sup>ʰ</sup> aʒ<br>el    | radʒ<br>el       | r <sup>ʰ</sup> a:<br>gil | rədʒdʒ<br>a:l            | ridʒdʒ<br>a:l            | zala<br>mi               | radʒə<br>l              | Intsa<br>n              | rayya<br>al              | radʒdʒ<br>a:l            | radʒil              | 'zaaker,<br>ra'ʒul | ragi      |
| 52 | MANY     | kaθ<br>i:r               | bez<br>zaf                 | ħaf<br>na        | kitii<br>r               | kti:r                    | hwa:ʒ<br>a               | tʃθi:r                   | kəti:r                  | xtir                    | waa<br>dʒid              | kaθi:<br>r               | kati:r              | ka'siir            | *milan    |
| 53 | MELAT    | laħ<br>m                 | lħa<br>m                   | laħa<br>m        | laħ<br>ma                | (laħa<br>m)              | laħa<br>m                | laħm                     | laħə<br>m               | l-ħ-<br>m               | laħa<br>m                | laħm                     | la:ma               | læħəm              | la:m      |
| 54 | MOON     | qa<br>ma<br>r            | ga<br>mr <sup>ʰ</sup><br>a | ʔam<br>ar        | ʔam<br>ar                | ʔama<br>r <sup>ʰ</sup>   | gum<br>ar                | kama<br>r <sup>ʰ</sup>   | 11                      | q-m-<br>r               | gama<br>r                | gama<br>r                | gamar               | qamar              | *ʃa(h)ari |
| 55 | MOUNTAIN | dʒa<br>bal               | ʒbe<br>l                   | mu<br>nta<br>nja | gab<br>al*               | dʒab<br>al               | dʒiba<br>l               | tsaba<br>l               | dʒab<br>al              | ʒipel                   | dʒiba<br>l               | dʒab<br>al*              | hadʒar              | dʒabal             | dʒebel    |
| 56 | MOUTH    | fam                      | fo<br>mm                   | ħalʔ             | buʔ<br>ʔ                 | təm<br>m                 | ħaliq                    | ħalk,<br>bu:z            | təm<br>m                | *xan<br>k<br>ħ-n-<br>k  | ħaldʒ<br>,<br>buuz       | fum<br>m*                | gaddu:ma            | bæb                | *kasma    |
| 57 | NAME     | ism                      | smi<br>ja                  | ise<br>m         | ism                      | ʔəsə<br>m                | ʔisim                    | ism                      | əsəm                    | ʔ-s-<br>m               | isim                     | ʔism                     | isim                | ʔisim              | *asma     |
| 5  | NECK     | ʃun                      | ʃen                        | ʃonʔ             | raʔa                     | raʔbe                    | rugb                     | raka                     | 12                      | r-q-                    | rgub                     | rugb                     | ragaba              | 6                  | *ragabt   |

|    |            |                |           |              |                   |              |             |                          |             |                            |             |             |              |         |                           |
|----|------------|----------------|-----------|--------------|-------------------|--------------|-------------|--------------------------|-------------|----------------------------|-------------|-------------|--------------|---------|---------------------------|
| 8  |            | q              | q         |              | ba*               |              | a           | ba                       |             | b                          | a           | eh          |              |         | u                         |
| 59 | NE<br>W    | dʒa<br>di:d    | ʒdi<br>d  | dʒdi<br>da   | gidii<br>d        | dʒdi:<br>d   | dʒidi:<br>d | tsadi:<br>d              | dʒədi<br>:d | ʒtit<br>dʒ-<br>d-d         | dʒadi<br>id | dʒadi<br>:d | dʒadi:d      | dʒadiid | dʒedid                    |
| 60 | NIG<br>HT  | lail<br>ah     | lila      | lejl         | leel<br>a         | leele        | leela       | leeli                    | lajl        | l-y-l                      | leel        | lajl        | le:le        | layl    | 4                         |
| 61 | NOS<br>E   | ʔun<br>f       | nif       | imni<br>:her | man<br>axii<br>r* | ʔanf         | xafi<br>m   | xiʃm                     | ənf         | maxu<br>r<br>n-x-r         | xafi<br>m   | nuxr<br>eh  | munxur       | ʔanf    | *nyanga<br>ratu           |
| 62 | NO<br>T    | la:            | ma<br>-ʃ  | mh<br>uʃ     | mi ʃ              | ma:          | mu:         | ma:                      | ma:         | l-ʔ                        | ma/<br>mu   | ma:         | mi/a         | 7       | ma                        |
| 63 | ONE        | ʔaħ<br>ad      | wa<br>ħed | wi:ħ<br>ed   | wa:<br>ħid        | wa:ħ<br>ed   | wa:ħi<br>d  | weeħ<br>di               | weeħ<br>əd  | exen,<br>exte<br>w-ħ-<br>d | waah<br>id  | wa:ħi<br>d  | wa:hid       | waahid  | wai                       |
| 64 | PER<br>SON | ʔins<br>a:n    | sije<br>d | pers<br>una  | ʃaxs<br>ˠ*        | zala<br>me   | ʃaxisˠ      | insa:<br>n<br>a:da<br>mi | nafar<br>ˠ  | insan<br>ʔ-n-s             | nafar       | ʃaybe<br>h? | na:di/u<br>m | adami   | azol<br>(EAzol,<br>p.210) |
| 65 | RAI<br>N   | mat<br>ˠar     | ʃta       | ʃita         | mat<br>ˠar        | mˠatˠ<br>arˠ | mutˠ<br>ar  | matˠ<br>ar               | matˠ<br>ar  | ʃ-t-y                      | matˠ<br>ar  | matˠ<br>ar  | almatˠara    | mata'ra | matara                    |
| 66 | RED        | ʔaħ<br>ma<br>r | ħm<br>erˠ | aħm<br>ar    | aħm<br>ar         | ʔaħm<br>ar   | ʔaħm<br>ar  | ʔaħm<br>arˠ              | aħma<br>r   | axma<br>r<br>ħ-m-<br>r     | ʔaħm<br>ar  | ʔaħm<br>ar  | e:mar        | ʔaħmar  | ˠamer                     |
| 6  | RO<br>AD   | tˠar           | tˠrˠi     | triʔ         | tˠari             | tˠari:ʔ      | tˠari:      | tˠari:                   | tˠare       | trup                       | tˠarii      | tˠari:      | 3            | darb    | *siika                    |

|        |               |                                |                              |              |                   |             |                        |                             |                   |                   |              |                     |        |       |               |
|--------|---------------|--------------------------------|------------------------------|--------------|-------------------|-------------|------------------------|-----------------------------|-------------------|-------------------|--------------|---------------------|--------|-------|---------------|
| 7      |               | i:q                            | q                            |              | :ʔ                |             | q                      | k                           | eq                | (pl)<br>d-r-<br>b | g            | g                   |        |       |               |
| 6<br>8 | RO<br>OT      | dʒa<br>ðr                      | ʒde<br>r                     | ʒerʔ         | l                 | ʃərəʃ       | ʃirig                  | gaʃr,<br>ʃirʃ<br>tsidir     | ʃəroo<br>q        | 10                | jiðir        | ʃirgin<br>**        | lrg    | 8     | asab          |
| 6<br>9 | RO<br>UN<br>D | mud<br>aww<br>ar               | md <sup>ɿ</sup><br>uww<br>er | Ton<br>d     | mid<br>aww<br>ar* | mdaw<br>war | mdaw<br>war            | mda<br>wwar<br>ɿ            | məda<br>wwər<br>ɿ | 11                | muda<br>wwar | muda<br>wwar*       | da:jir | 9     | 5             |
| 7<br>0 | SAN<br>D      | ra<br>ml                       | r <sup>ɿ</sup> e<br>mla      | ram<br>el    | ram<br>l*         | raməl       | ramu<br>l <sup>ɿ</sup> | raml <sup>ɿ</sup>           | 13                | 12                | ramil        | 4                   | keesa  | 10    | lumra         |
| 7<br>1 | SAY           | qa:l<br>a                      | q(g)<br>)al                  | ʔal          | ʔa:l*             | ʔa:l        | ga:l                   | ka:l <sup>ɿ</sup>           | qa:l              | q-w-<br>l         | gaal         | ga:l                | ga:l   | qɔɔl  | ke<br>lemu    |
| 7<br>2 | SEE           | raʔ<br>a:                      | ʃaf                          | ra           | ʃa:f              | ʃa:f        | ʃa:f                   | ʃa:f,<br>t <sup>ɿ</sup> ass | ar <sup>ɿ</sup> a | q-ʃ-ʃ             | ʃaaf         | ibs <sup>ɿ</sup> ar | ʃa:f   | ʃaaf  | aainu         |
| 7<br>3 | SEE<br>D      | biz<br>r                       | ʒerr<br>iʃa                  | zerr<br>i:ʃa | ħab<br>ba         | bəzr<br>e   | bazra                  | biðr                        | bazər<br>ħabb     | ptar<br>b-z-<br>r | baðr<br>a    | habb<br>eh          | te:rab | 11    | eena<br>(eye) |
| 7<br>4 | SIT           | qaʃ<br>ada<br>,dʒa<br>las<br>a | gle<br>s                     | ʔaʃa<br>d    | ʔaʃa<br>d         | ʔaʃad       | giʃad                  | kaʃa<br>d                   | qəʃə<br>d         | q-ʃ-<br>d         | gaʃa<br>d    | dʒala<br>s          | ga'ad  | qaʃad | *ge(e)n       |
| 7<br>5 | SKI<br>N      | dʒil<br>d                      | ʒel<br>d                     | dʒil<br>da   | gild<br>*         | dʒələ<br>d  | dʒilid                 | tsild                       | dʒəld             | s-l-x             | dʒild        | dʒild               | dʒilde | dʒild | Gildu         |
| 7      | SLE<br>EP     | na:                            | nʃe                          | irʔa         | naa               | na:m        | na:m                   | na:m                        | na:m              | n-w-              | naam         | raga                | no:m   | naum  | num           |



|        |           |                          |                                     |                           |                               |                     |                           |                          |                                         |                         |                          |                          |                     |               |        |
|--------|-----------|--------------------------|-------------------------------------|---------------------------|-------------------------------|---------------------|---------------------------|--------------------------|-----------------------------------------|-------------------------|--------------------------|--------------------------|---------------------|---------------|--------|
| 6      |           | ma                       | s                                   | d                         | m                             |                     |                           |                          |                                         | m                       | ,<br>rigad               | d                        |                     |               |        |
| 7<br>7 | SM<br>ALL | s <sup>ʕ</sup> a<br>yi:r | s <sup>ʕ</sup> yi<br>r <sup>ʕ</sup> | zyir                      | s <sup>ʕ</sup> uy<br>ajjar    | z <sup>ʕ</sup> yi:r | s <sup>ʕ</sup> ʔajj<br>ir | s <sup>ʕ</sup> ayi:<br>r | ʔəzi:r<br>(aq)<br>zəʔaj<br>jər<br>(arb) | s <sup>ʕ</sup> -ʔ-<br>r | s <sup>ʕ</sup> ayii<br>r | s <sup>ʕ</sup> ayi:<br>r | dagi:g              | sa;yiir       | Sakar  |
| 7<br>8 | SM<br>OKE | dux<br>a:n               | dox<br>xan                          | duḥ<br>ḥan                | dux<br>xa:n                   | dəxxa<br>:n         | duxx<br>a:n               | daxan<br>i               | 14                                      | d-x-<br>n               | duxa<br>an               | duxx<br>a:n              | duxa:n              | d3arra        | Dukan  |
| 7<br>9 | STA<br>ND | qa:<br>ma                | wq<br>ef                            | ʔam                       | wiʔi<br>f                     | waʔʔ<br>af          | wuga<br>f                 | kaʕa<br>d,<br>ka:m       | qa:m                                    | w-q-<br>f               | wuga<br>f                | sann<br>ab               | anʔadal             | qɔm           | Gum    |
| 8<br>0 | STA<br>R  | na<br>dʒ<br>ma           | nez<br>ma                           | still<br>a,<br>kew<br>kba | nig<br>ma*                    | nadʒ<br>me          | nadʒ<br>ma                | nitsm<br>i               | 15                                      | n-<br>dʒ-m              | nadʒ<br>ma               | nadʒ<br>m                | nadʒima             | nudʒum        | *nezma |
| 8<br>1 | STO<br>NE | ḥa<br>dʒa<br>rah         | ḥez<br>ra                           | dʒe<br>bla                | ḥag<br>ar <sup>ʕ</sup> a<br>* | ḥadʒa<br>ra         | ḥdʒa:<br>ra               | ḥatsa<br>r               | ḥadʒa<br>r                              | ḥ-<br>dʒ-r              | ḥadʒa<br>r               | ḥadʒa<br>r               | hidʒer              | hadʒar        | Lager  |
| 8<br>2 | SUN       | ʃa<br>ms                 | ʃe<br>mf                            | ʃem<br>ʃ                  | ʃam<br>s                      | ʃamə<br>s           | ʃamis                     | ʃams                     | ʃams                                    | ʃimp<br>s               | ʃams                     | ʃams                     | ʃam                 | ʃams          | *semsi |
| 8<br>3 | SWI<br>M  | sab<br>aḥa               | ʕa<br>m                             | ʕam                       | ʕa:<br>m                      | saba<br>ḥ           | sibaḥ                     | saba<br>ḥ                | zəbə<br>ḥ                               | ʔ-s-l                   | sibaḥ                    | ʕa:m                     | a:m                 | ʕobḥaya<br>an | ‘hum   |
| 8<br>4 | TAI<br>L  | ḏan<br>ab                | ʃuw<br>wal                          | Den<br>b                  | dan<br>ab                     | dana<br>b           | ḏeel                      | ḏeel                     | 15                                      | ḏ-n-<br>b               | ḏeel,<br>itʃwa           | ḏeeli<br>n**             | danab               | zeel          | Danab  |
| 8      | THA<br>T  | ḏali                     | dak                                 | dak                       | da                            | hada:               | (ha:)ḏ                    | (ha)ḏ                    | hada:                                   | ʔ-x-                    | (ha)ḏ                    | ḏajjik                   | d <sup>ʕ</sup> a:ka | duuk          | Nade   |

|    |                |                  |           |            |             |                            |             |                    |                                 |                            |             |                       |        |         |                 |
|----|----------------|------------------|-----------|------------|-------------|----------------------------|-------------|--------------------|---------------------------------|----------------------------|-------------|-----------------------|--------|---------|-----------------|
| 5  |                | ka               |           |            |             | k                          | a:k         | a:tʃ               | k                               | ð                          | aak         | ,<br>tajjik           |        |         |                 |
| 86 | THI<br>S       | ha:<br>ða:       | had       | din        | da          | ha:da                      | ha:ða       | ha:(ði<br>)        | hada:                           | h-ʔ                        | haað<br>a   | ðajjih<br>,<br>tajjeh | da:    | haa     | Wede            |
| 87 | TH<br>OU       | ʔan<br>ta        | nta       | int        | inta        | ʔənte                      | ʔinta       | int                | ənta                            | ʔ-n-t                      | inta        | ʔant                  | inta   | hint    | ‘ita            |
| 88 | TO<br>NG<br>UE | lisa<br>:n       | lsa<br>n  | lsi:n      | lisa<br>an* | lsa:n                      | lisa:n      | lsi:in             | seen                            | l-s-n                      | lisaa<br>n  | lisaa<br>n            | lisa:n | li’saan | *lisaan         |
| 89 | TO<br>OT<br>H  | sin<br>n         | sen<br>n  | sins       | sinn        | sənn                       | sinn        | sinn               | s-n-<br>n                       | snan(<br>pl)<br>s-n-<br>n  | sinn        | sinn                  | sinn   | 12      | sunun,<br>sin   |
| 90 | TRE<br>E       | ʃa<br>dʒa<br>rah | ʃeʒ<br>ra | sidʒ<br>ra | ʃag<br>ara  | ʃadʒa<br>ra                | ʃadʒa<br>ra | ʃatsa<br>rʕa       | ʃədʒa<br>rʕa,d<br>a:re<br>(arb) | 13                         | ʃidʒar<br>a | ʃidʒar<br>eh          | ʃadara | ʔarab   | ʃeder/se<br>der |
| 91 | TWO            | iθn<br>a:ni      | ʒuʒ       | Tnej<br>n  | itne<br>en  | tnee<br>n,<br>ʔtinte<br>en | θnee<br>n   | θnee<br>n,<br>neel | tənaj<br>n                      | xnay<br>n<br>θ-n-<br>y     | iθnee<br>n  | θinta<br>jn           | tine:n | usnaa   | Tinin           |
| 92 | WAL<br>K       | ma<br>ʃa:        | mʃ<br>a   | mɛʃ<br>a   | miʃi        | məʃi                       | miʃa        | maʃa               | məʃi                            | miʃi,<br>mpʃa<br>m-ʃ-<br>y | miʃa        | xutʕi                 | maʃa   | ʔadak   | Mashi           |
| 9  | WARM           | ħa:              | dafi      | ʃhu        | da:f        | ʃoob                       | da:fi       | di:fi              | 16                              | *saxa                      | ħaam        | da:fi*                | sa:xin | ħar     | Hari            |

|             |                |                         |                        |             |                         |                           |                          |                          |                         |                                      |                          |                          |                     |          |               |
|-------------|----------------|-------------------------|------------------------|-------------|-------------------------|---------------------------|--------------------------|--------------------------|-------------------------|--------------------------------------|--------------------------|--------------------------|---------------------|----------|---------------|
| 3           |                | mm                      | ,<br>sxu<br>n          | na          | i:*                     |                           |                          |                          |                         | n (v)                                | i                        |                          |                     | r        |               |
| 94          | WA<br>TER      | ma:<br>ʔ                | ma                     | ilma        | may<br>ya*              | m <sup>ʕ</sup> ajj<br>(e) | ma:j                     | imi                      | ma:j                    | m-<br>w-h                            | maay                     | maaʔ                     | alme                | maa      | mojo,<br>alme |
| 95          | WE             | naħ<br>nu               | ħna                    | aħn<br>a    | iħna                    | nəħn<br>a                 | ʔiħna                    | iħna                     | nəħn<br>a               | n-ħ-<br>n                            | iħna                     | ħna                      | ani:na              | nəħna    | lna           |
| 96          | WH<br>AT       | ma:<br>(nu)             | aʃ(<br>nu)             | ʃ           | eeh                     | ʃu:                       | ʃ(nu)                    | eeʃ,<br>ʃnu:,ʃ<br>ni:    | aʃ                      | ʔ-y-y                                | ʃinhu<br>, ʃ-,<br>weeʃ   | ma:<br>ʔajʃ              | ʃinu                | iʃ       | su'nu         |
| 97          | WHI<br>TE      | ʔab<br>jad <sup>ʕ</sup> | bje<br>d <sup>ʕ</sup>  | abja<br>d   | abja<br>d <sup>ʕ</sup>  | ʔabja<br>d <sup>ʕ</sup>   | ʔabja<br>ð <sup>ʕ</sup>  | ʔabja<br>ð <sup>ʕ</sup>  | ʔabja<br>d <sup>ʕ</sup> | apky<br>að<br>b-y-<br>d <sup>ʕ</sup> | ʔabja<br>d <sup>ʕ</sup>  | ʔabja<br>ð <sup>ʕ</sup>  | abjad <sup>ʕ</sup>  | ʔabiyad  | abja          |
| 98          | WH<br>O        | ma<br>n                 | ʃku<br>n               | min         | mi:<br>n                | mi:n                      | minu                     | ma:n                     | məni                    | m-n                                  | min                      | man                      | mine<br>ja:tu       | miin     | munu          |
| 99          | WO<br>MA<br>N  | imr<br>aʔa<br>h         | mr<br>a                | mar<br>a    | sitt                    | mara                      | mara                     | mrajj<br>i               | mar <sup>ʕ</sup><br>a   | mara<br>m-r-<br>ʔ                    | mara                     | mare<br>h                | mara                | ʔimraʔat | marja         |
| 100         | YEL<br>LO<br>W | ʔas <sup>ʕ</sup><br>far | s <sup>ʕ</sup> fe<br>r | sfajj<br>ar | as <sup>ʕ</sup> f<br>ar | ʔas <sup>ʕ</sup> f<br>ar  | ʔas <sup>ʕ</sup> f<br>ar | ʔas <sup>ʕ</sup> f<br>ar | as <sup>ʕ</sup> far     | s <sup>ʕ</sup> -f-<br>r              | ʔas <sup>ʕ</sup> f<br>ar | ʔas <sup>ʕ</sup> f<br>ar | as <sup>ʕ</sup> far | ʔasfar   | *kuruku<br>m  |
| P<br>o<br>s |                |                         | 10<br>0                | 100         | 99                      | 100                       | 100                      | 98                       | 84                      | 87                                   | 100                      | 96                       | 97                  | 88       | 95            |
|             |                | CA                      | Mor                    | Mlt         | Cai                     | Dms                       | Irq                      | Souk                     | AqAr                    | Cyp                                  | Glɸ                      | Ymn                      | Nig                 | Bux      | Nubi          |



[illegible]

[illegible]

|    |       |         |   |   |   |   |   |   |   |   |   |   |   |   |   |      |
|----|-------|---------|---|---|---|---|---|---|---|---|---|---|---|---|---|------|
| 40 | HEART | qalb    | 1 | 1 | 1 | 1 | 1 | 1 | 0 | 1 | 1 | 1 | 1 | 1 | 1 | 0.92 |
| 41 | HORN  | qarn    | 1 | 1 | 1 | 1 | 1 | 1 | 0 | 1 | 1 | 1 | 1 | 0 | 1 | 0.92 |
| 42 | I     | ?ana:   | 1 | 1 | 1 | 1 | 1 | 1 | 1 | 1 | 1 | 1 | 1 | 1 | 1 | 1    |
| 43 | KILL  | qatala  | 1 | 1 | 0 | 1 | 1 | 1 | 1 | 1 | 1 | 1 | 1 | 1 | 1 | 0.92 |
| 44 | KNEE  | rukbat  | 1 | 1 | 1 | 1 | 1 | 1 | 0 | 0 | 1 | 1 | 1 | 0 | 1 | 1    |
| 45 | KNOW  | ʕarafa  | 1 | 1 | 1 | 1 | 1 | 1 | 1 | 1 | 1 | 0 | 1 | 0 | 1 | 0.77 |
| 46 | LEAF  | waraqat | 1 | 1 | 1 | 1 | 1 | 1 | 1 | 0 | 1 | 1 | 1 | 1 | 0 | 0.92 |
| 47 | LIE   | raqada  | 0 | 0 | 0 | 0 | 0 | 0 | 0 | 0 | 0 | 1 | 1 | 0 | 0 | 0.2  |
| 48 | LIVER | kabid   | 1 | 0 | 1 | 1 | 1 | 0 | 0 | 0 | 1 | 1 | 1 | 1 | 1 | 0.82 |
| 49 | LONG  | tʕawi:l | 1 | 1 | 1 | 1 | 1 | 1 | 1 | 1 | 1 | 1 | 1 | 1 | 1 | 1    |
| 50 | LOUSE | qamlah  | 1 | 1 | 1 | 1 | 1 | 1 | 0 | 1 | 1 | 1 | 0 | 1 | 0 | 1    |
| 51 | MAN   | radʕul  | 1 | 1 | 1 | 1 | 1 | 0 | 1 | 0 | 1 | 1 | 1 | 0 | 1 | 0.77 |
| 52 | MANY  | kaθi:r  | 0 | 0 | 1 | 1 | 0 | 1 | 1 | 1 | 0 | 1 | 1 | 1 | 1 | 0.69 |
| 53 | MEAT  | laħm    | 1 | 1 | 1 | 1 | 1 | 1 | 1 | 1 | 1 | 1 | 1 | 1 | 1 | 1    |
| 54 | MOON  | qamar   | 1 | 1 | 1 | 1 | 1 | 1 | 0 | 1 | 1 | 1 | 1 | 1 | 0 | 0.92 |

|    |          |          |   |   |   |   |   |   |   |   |   |   |   |   |   |      |
|----|----------|----------|---|---|---|---|---|---|---|---|---|---|---|---|---|------|
| 55 | MOUNTAIN | dʒabal   | 1 | 0 | 1 | 1 | 1 | 1 | 1 | 1 | 1 | 1 | 0 | 1 | 1 | 0.85 |
| 56 | MOUTH    | fam      | 1 | 0 | 0 | 0 | 0 | 0 | 0 | 0 | 0 | 1 | 0 | 0 | 0 | 0.15 |
| 57 | NAME     | ism      | 1 | 1 | 1 | 1 | 1 | 1 | 1 | 1 | 1 | 1 | 1 | 1 | 1 | 1    |
| 58 | NECK     | ʕunuq    | 1 | 1 | 0 | 0 | 0 | 0 | 0 | 0 | 0 | 0 | 0 | 0 | 0 | 0.18 |
| 59 | NEW      | dʒadi:d  | 1 | 1 | 1 | 1 | 1 | 1 | 1 | 1 | 1 | 1 | 1 | 1 | 1 | 1    |
| 60 | NIGHT    | lailah   | 1 | 1 | 1 | 1 | 1 | 1 | 1 | 1 | 1 | 1 | 1 | 1 | 0 | 1    |
| 61 | NOSE     | ʔunf     | 1 | 0 | 0 | 1 | 0 | 0 | 1 | 0 | 0 | 0 | 0 | 1 | 0 | 0.31 |
| 62 | NOT      | la:      | 0 | 0 | 0 | 0 | 0 | 0 | 0 | 1 | 0 | 0 | 0 | 0 | 0 | 0.08 |
| 63 | ONE      | ʔaħad    | 1 | 1 | 1 | 1 | 1 | 1 | 1 | 1 | 1 | 1 | 1 | 1 | 1 | 1    |
| 64 | PERSON   | ʔinsa:n  | 0 | 0 | 0 | 0 | 0 | 1 | 0 | 1 | 0 | 0 | 0 | 0 | 0 | 0.15 |
| 65 | RAIN     | matʕar   | 0 | 0 | 1 | 1 | 1 | 1 | 1 | 0 | 1 | 1 | 1 | 1 | 1 | 0.77 |
| 66 | RED      | ʔaħmar   | 1 | 1 | 1 | 1 | 1 | 1 | 1 | 1 | 1 | 1 | 1 | 1 | 1 | 1    |
| 67 | ROAD     | tʕari:q  | 1 | 1 | 1 | 1 | 1 | 1 | 1 | 0 | 1 | 1 | 0 | 0 | 0 | 0.75 |
| 68 | ROOT     | dʒaðr    | 1 | 0 | 1 | 0 | 0 | 0 | 0 | 0 | 1 | 0 | 0 | 0 | 0 | 0.3  |
| 69 | ROUND    | mudawwar | 1 | 0 | 1 | 1 | 1 | 1 | 1 | 0 | 1 | 1 | 1 | 0 | 0 | 0.9  |



|    |       |                |   |   |   |   |   |   |   |   |   |   |   |   |   |      |
|----|-------|----------------|---|---|---|---|---|---|---|---|---|---|---|---|---|------|
| 70 | SAND  | raml           | 1 | 1 | 1 | 1 | 1 | 1 | 0 | 0 | 1 | 0 | 0 | 0 | 1 | 0.89 |
| 71 | SAY   | qa:la          | 1 | 1 | 1 | 1 | 1 | 1 | 1 | 1 | 1 | 1 | 1 | 1 | 0 | 0.92 |
| 72 | SEE   | raʔa:          | 0 | 1 | 0 | 0 | 0 | 0 | 1 | 0 | 0 | 0 | 0 | 0 | 0 | 0.15 |
| 73 | SEED  | zarʕ<br>bizr   | 0 | 0 | 0 | 1 | 1 | 1 | 1 | 1 | 1 | 0 | 0 | 0 | 0 | 0.5  |
| 74 | SIT   | qaʕad          | 0 | 1 | 1 | 1 | 1 | 1 | 1 | 1 | 1 | 0 | 1 | 1 | 0 | 0.77 |
| 75 | SKIN  | dʒild          | 1 | 1 | 1 | 1 | 1 | 1 | 1 | 0 | 1 | 1 | 1 | 1 | 1 | 0.92 |
| 76 | SLEEP | na:ma          | 0 | 0 | 1 | 1 | 1 | 1 | 1 | 1 | 1 | 0 | 1 | 1 | 1 | 0.77 |
| 77 | SMALL | sʕay:r         | 1 | 1 | 1 | 1 | 1 | 1 | 0 | 1 | 1 | 1 | 0 | 1 | 1 | 0.85 |
| 78 | SMOKE | duxa:n         | 1 | 1 | 1 | 1 | 1 | 1 | 0 | 1 | 1 | 1 | 1 | 0 | 1 | 0.92 |
| 79 | STAND | qa:ma          | 0 | 1 | 1 | 0 | 0 | 0 | 0 | 0 | 1 | 0 | 0 | 1 | 1 | 0.38 |
| 80 | STAR  | nadʒma         | 1 | 0 | 1 | 1 | 1 | 1 | 0 | 1 | 1 | 1 | 1 | 1 | 1 | 0.85 |
| 81 | STONE | ħadʒarah       | 1 | 0 | 1 | 1 | 1 | 1 | 1 | 1 | 1 | 1 | 1 | 1 | 1 | 0.92 |
| 82 | SUN   | ʕams           | 1 | 1 | 1 | 1 | 1 | 1 | 1 | 1 | 1 | 1 | 1 | 1 | 1 | 1    |
| 83 | SWIM  | sabaħa<br>ʕaam | 0 | 0 | 0 | 1 | 1 | 1 | 1 | 0 | 1 | 0 | 0 | 1 | 0 | 0.46 |



|          |        |         |        |        |        |        |        |        |          |        |        |        |        |        |        |       |
|----------|--------|---------|--------|--------|--------|--------|--------|--------|----------|--------|--------|--------|--------|--------|--------|-------|
| 98       | WHO    | man     | 0      | 1      | 1      | 1      | 1      | 1      | 1        | 1      | 1      | 1      | 1      | 1      | 1      | 0.92  |
| 99       | WOMAN  | imraʔah | 1      | 1      | 0      | 1      | 1      | 1      | 1        | 1      | 1      | 1      | 1      | 1      | 1      | 0.92  |
| 100      | YELLOW | ʔasˤfar | 1      | 1      | 1      | 1      | 1      | 1      | 1        | 1      | 1      | 1      | 1      | 1      | 0      | 0.92  |
| Sum      |        |         | 77     | 76     | 83     | 85     | 82     | 84     | 69       | 66     | 82     | 76     | 73     | 67     | 69     | 76.08 |
| Possible |        |         | 100    | 100    | 99     | 100    | 100    | 98     | 84       | 87     | 100    | 96     | 97     | 88     | 95     |       |
| pro-rate |        |         | 77     | 76     | 84     | 85     | 82     | 86     | 82       | 74     | 82     | 79     | 75     | 76     | 73     | 79.23 |
|          |        |         |        |        |        |        |        |        |          |        |        |        |        |        |        | Avg.  |
| 1.4 root |        | 0       | .830   | .822   | .883   | .890   | .868   | .896   | .868     | .806   | .868   | .845   | .814   | .822   | .799   | 0.846 |
|          |        | CA      | CA-Mor | CA-Mlt | CA-Cai | CA-Dms | CA-Irq | CA-Skh | CA-AqArb | CA-Cyp | CA-Glf | CA-Ymn | CA-Nig | CA-Bux | CA-Nub |       |
