# Supplementary material
Source: publisher figshare collection journal article supplement (https://brill.figshare.com/articles/dataset/_/11688558)
Supplement: Supplementary file 2 [file 1]

## Interdialectal syntax comparison

Table 1 raw data

|    |                                              | CA                         | Mor                        | Mlt                       | Cai                 | Dms                 | Skh                | Irq                        | AqArb                    | Glif                      | Ymn                            | Cyp                                       | Nig                                        | Nubi       | Bux                                      |
|----|----------------------------------------------|----------------------------|----------------------------|---------------------------|---------------------|---------------------|--------------------|----------------------------|--------------------------|---------------------------|--------------------------------|-------------------------------------------|--------------------------------------------|------------|------------------------------------------|
| 1  | V&S                                          | VS                         | VS                         | SV                        | VS                  | VS                  | SV                 | VS                         | VS                       | SV                        | SV                             | VS                                        | VS                                         | SV         | SV                                       |
| 2  | V&O                                          | VO                         | VO                         | VO                        | VO                  | VO                  | VO                 | VO                         | VO                       | VO                        | VO                             | VO                                        | VO                                         | VO         | OV                                       |
| 3  | N&A                                          | NA                         | NA                         | NA                        | NA                  | NA                  | NA                 | NA                         | NA                       | NA                        | NA                             | NA,AN                                     | NA                                         | NA         | N---n-<br>--A                            |
| 4  | N&G                                          | NG                         | NG                         | NG                        | NG                  | NG                  | NG                 | NG                         | NG                       | NG                        | NG                             | NG                                        | NG                                         | NG         | NG,G<br>N<br>---pro                      |
| 5  | N&Rel                                        | NR                         | NR                         | NR                        | NR                  | NR                  | NR                 | NR                         | NR                       | NR                        | NR                             | NR                                        | NR                                         | NR         | RN                                       |
| 6  | Prep/<br>Post                                | Prep                       | Prep                       | Prep                      | Prep                | Prep                | Prep               | Prep                       | Prep                     | Prep                      | Prep                           | Prep                                      | prep                                       | Prep       | Prep                                     |
| 7  | N&Dem                                        | Dem-<br>--<br>DA-<br>--N   | Dem-<br>--<br>DA-<br>--N   | Dem---DA-<br>--N          | DA---N-<br>--dem    | DemN                | NDem               | DemN                       | DemDA<br>--- N           | Dem---<br>DA---N          | Dem<br>N<br>,<br>NDe<br>m      | DemN                                      | NDem                                       | Ndem       | DemN                                     |
| 8  | def art                                      | DA-<br>--N<br>(DA-<br>--A) | DA-<br>--N<br>(da-<br>--A) | DA---N(A<br>or<br>DA---A) | DA---N<br>(DA--- A) | DA---N<br>(DA--- A) | DA---N             | DA-<br>--N<br>(DA-<br>--A) | DA---<br>N(DA)A          | DA---N                    | DA-<br>--N                     | DA---<br>N(DA<br>---<br>A),DA---<br>A---N | DA---<br>N(da-<br>-- A)                    | NP---DA    | no<br>DA                                 |
| 9  | morph<br>marking<br>of v<br>arg<br>cases     | NOM,<br>ACC                | NoCase                     | lii---ACC                 | NoCase              | NoCase              | No<br>Cas<br>e     | No<br>Case                 | No<br>Case               | No<br>Case                | No<br>Case<br>?                | Acc. l---<br>Case<br>?                    | NoCas<br>e,<br>opt.A<br>cc<br>le---,<br>fi | No<br>Case | no<br>case,<br>o<br>pt.AC<br>C il-<br>-- |
| 10 | gen<br>phrase<br>gp<br>gen<br>particle<br>gc | NG---gc                    | N gp-<br>--G               | NG,N---gp G               | N gp---G            | NG, N<br>gp--- G    | N---gp-<br>-- G,NG | NG,<br>N<br>gp-<br>--G     | N---gp-<br>--G<br>daNdaG | NG,<br>N-<br>--gp---<br>G | NG<br>(N-<br>--gp<br>---<br>G) | N---gp-<br>--G, N-<br>--pro---G           | NG,N---<br>---gp---<br>--G                 | Ngp---G    | NG,N-<br>--<br>gp-<br>--G,<br>GN-<br>--  |

|    |                           |        |        |              |        |        |      |       |       |      |             |       |       |           |      |
|----|---------------------------|--------|--------|--------------|--------|--------|------|-------|-------|------|-------------|-------|-------|-----------|------|
|    | gen<br>case               |        |        |              |        |        |      |       |       |      |             |       |       |           | Ppro |
| 11 | gramma<br>tical<br>gender | 2Gnd   | 2Gnd   | 2Gnd         | 2Gnd   | 2Gnd   | 2Gnd | 2Gnd  | 2Gnd  | 2Gnd | 2Gnd        | 2Gnd  | 2Gnd  | No<br>Gnd | 2Gnd |
| 12 | copula,                   | juxt., | juxt., | juxt.,pron.c | juxt., | juxt., | juxt | juxt. | pron. | juxt | juxt,p<br>r | pron. | juxt. | juxt.,V   | ?    |

|    |                                                 |                    |            |                 |                |            |                |               |                    |                    |                |                             |                                             |                          |                                 |
|----|-------------------------------------------------|--------------------|------------|-----------------|----------------|------------|----------------|---------------|--------------------|--------------------|----------------|-----------------------------|---------------------------------------------|--------------------------|---------------------------------|
|    | V or other                                      | pron.cop           | pron.co p  | op              | particle<V cop | pron.cop   |                |               | cop                |                    | on cop..       | cop                         |                                             | (kan kun)                |                                 |
| 13 | existential, V or other                         | Vparticip le exist | Vexist     | non V exist fih | nonVexist      | nonV exist | Particle bi    | particl e aku | particle exist     | part fi            | part fi        | part fi                     | part fi exist                               | nonV exist,fi            | Vexist                          |
| 14 | existential--- relational “have”                | prep---pro         | prep-- pro | Vhave kellu     | prep---pro     | prep---pro | prep---pro     | prep-- pro    | VhaveV-- possessor | prep'i nd--- pr0   | Prep (l)---pro | prep (li)--- pro;past kallu | prep-- pro                                  | V(end u,end u)           | prep-- pro                      |
| 15 | TAM particles                                   | no TAM suffix      | preV TAM   | no TAM          | preV TAM       | preV TAM   | preV TAM       | preV TAM      | preV TAM           | 0,pref TAM bi rare | pref TAM       | pref TAM                    | part--- n--- pro=p res/ha bit,b-- pres. ind | preV TAM or adv          | pre.mi =pres. part+n +pro= perf |
| 16 | inflected auxiliary dominating inflected main V | NoAux              | NoAux      | kien            | NoAux          | NoAux      | NoAux, ex kaan | NoAux , chaan | NoAux              | NoAu x             | NoA u x?       | NoAux ex .kaan              | No Aux                                      | Aux kan,r u a            | part aux dom. i nfl V           |
| 17 | position of verbal negation                     | nV                 | nVn        | nVn             | nVn            | nV         | nV,nVn         | nV            | nV                 | nV                 | nVn            | nV                          | nV                                          | nV, sent final, variable | nV                              |
| 18 | V in comp clauses, inf or inflected             | CompV              | CompV      | CompV           | CompV          | CompV      | Comp V         | Comp V        | CompV              | Comp V             | Comp V         | CompV                       | Comp V                                      | Comp bareV               | inf Comp                        |
| 19 | product                                         | Vn                 | vn         | Vn              | vn             | vn         | vn?            | vn            | vn                 | vn?                | vn             | vn                          | vn                                          | prod.v                   | prod.i                          |

|    |                                                                                  |                  |                     |                  |                  |                  |                   |                     |                  |                     |                                     |                  |                          |                             |                           |
|----|----------------------------------------------------------------------------------|------------------|---------------------|------------------|------------------|------------------|-------------------|---------------------|------------------|---------------------|-------------------------------------|------------------|--------------------------|-----------------------------|---------------------------|
|    | ive inf/<br>non---<br>prod<br>VN                                                 |                  |                     |                  |                  |                  |                   |                     |                  |                     |                                     |                  |                          | n<br>&<br>inf               | nf                        |
| 20 | V in<br>coordin<br>ate<br>clauses:<br>converb<br>or<br>fully inf<br>lecte<br>d V | full V           | full V              | full V           | full V           | full V           | fullV             | full V              | fullV            | full V              | fullV?                              | fullV            | fullV                    | bareV                       | full<br>V<br>(or<br>part) |
| 21 | NP<br>vs.<br>VP<br>coordin<br>ation                                              | same co<br>NP/VP | same<br>co<br>NP/VP | same co<br>NP/VP | same co<br>NP/VP | same co<br>NP/VP | same co<br>NP/VP  | same<br>co<br>NP/VP | same co<br>NP/VP | same<br>co<br>NP/VP | same<br>co<br>NP/VP                 | same co<br>NP/VP | Nhaw<br>N,V0V            | NmaN<br>,VwaV               | NwN<br>V0V<br>?           |
| 22 | Rel<br>marker                                                                    | Rel Pro          | Rel Pro             | Rel Pro          | Rel Pro          | Rel Pro          | Rel Pro           | Rel<br>Pro          | Rel pro          | Rel<br>Pro          |                                     | Rel Pro<br>ta    | Rel<br>Pro               | Rel<br>pro                  | Rel<br>pro,0              |
| 23 | product<br>ive<br>active<br>participl<br>e                                       | prod. ap         | prod.<br>ap         | prod ap          | prod. ap         | prod. ap         | prod ap           | prod.<br>ap         | prod ap          | prod<br>ap          | prod<br>ap                          | prod ap          | prod<br>ap               | no<br>ap?                   | prod.<br>ap               |
| 24 | Q---<br>particle<br>in<br>yes/no<br>Qs                                           | QP---<br>initial | QP---<br>initial    | no QP            | no QP            | no QP            | postVQP-<br>-- sh | no QP               | no QP            | no QP               | no QP                               | no QP            | QP---<br>final ---<br>wa | noQ<br>P,int<br>o n<br>only | QP---<br>final            |
| 25 | wh---<br>position                                                                | wh---<br>initial | wh---<br>initial    | wh---initial     | wh---final       | wh- initial      | wh-initial        | wh---<br>initial    | wh---<br>initial | wh---<br>initial    | wh---<br>initial,<br>or<br>post---V | wh---<br>initial | wh---<br>in<br>situ      | wh<br>in<br>situ            | wh---<br>prever<br>bal    |

Table 2 Interdialectal comparison of syntactic features

|    |                                                 | Mor<br>Mlt | Mor<br>Cai | Mor<br>Dms | Mor<br>Skh | Mor<br>Irq | Mor<br>AqArb | Mor<br>Glif | Mor<br>Ymn | Mor<br>Cyp | Mor<br>Nig | Mor<br>Nubi | Mor<br>Bux |
|----|-------------------------------------------------|------------|------------|------------|------------|------------|--------------|-------------|------------|------------|------------|-------------|------------|
| 1  | V&S                                             | 0          | 1          | 1          | 1          | 0          | 1            | 0           | 0          | 1          | 1          | 0           | 0          |
| 2  | V&O                                             | 1          | 1          | 1          | 1          | 1          | 1            | 1           | 1          | 1          | 1          | 1           | 0          |
| 3  | N&A                                             | 1          | 1          | 1          | 1          | 1          | 1            | 1           | 1          | 1          | 1          | 1           | 0          |
| 4  | N&G                                             | 1          | 1          | 1          | 1          | 1          | 1            | 1           | 1          | 1          | 1          | 1           | 0          |
| 5  | N&Rel                                           | 1          | 1          | 1          | 1          | 1          | 1            | 1           | 1          | 1          | 1          | 1           | 0          |
| 6  | Prep/Post                                       | 1          | 1          | 1          | 1          | 1          | 1            | 1           | 1          | 1          | 1          | 1           | 1          |
| 7  | N&Dem                                           | 1          | 0          | 1          | 0          | 0          | 1            | 1           | 1          | 1          | 0          | 1           | 1          |
| 8  | def art                                         | .5         | 1          | 1          | 1          | 1          | 1            | 1           | 1          | .5         | 1          | 0           | 0          |
| 9  | morph marking of<br>V<br>arg cases              | 0          | 1          | 1          | 1          | 1          | 1            | 1           | 1          | 0          | 1          | 0           | 1          |
| 10 | gen phrase<br>gp gen<br>particle<br>gc gen case | 1          | 1          | 1          | 1          | 1          | 1            | .5          | .5         | 1          | 1          | 1           | .033       |
| 11 | grammatical gender                              | 1          | 1          | 1          | 1          | 1          | 1            | 1           | 1          | 1          | 1          | 1           | 1          |
| 12 | copula, V or other                              | 1          | 1          | 1          | 1          | 1          | 1            | 1           | 1          | .5         | 1          | 0           | 0          |
| 13 | existential, V or<br>other                      | 0          | 0          | 0          | 0          | 0          | 0            | 0           | 0          | 0          | 0          | 1           | 1          |
| 14 | existential---relational<br>“have”              | 0          | 1          | 1          | 1          | 1          | 0            | 1           | 1          | .5         | 1          | 0           | 1          |
| 15 | TAM particles                                   | 0          | 1          | 1          | 1          | 1          | 0            | 1           | 1          | 1          | 1          | 0           | 0          |

|    |                                                             |   |   |   |   |   |   |   |   |   |   |   |    |
|----|-------------------------------------------------------------|---|---|---|---|---|---|---|---|---|---|---|----|
| 16 | inflected aux<br>dominating<br>inflectedmain V              | 1 | 1 | 1 | 0 | 0 | 1 | 1 | 1 | 0 | 1 | 1 | 0  |
| 17 | position of verbal<br>negation                              | 1 | 1 | 0 | 1 | 0 | 1 | 1 | 0 | 0 | 0 | 0 | 0  |
| 18 | V in comp<br>clauses,<br>inf or inflected V                 | 1 | 1 | 1 | 1 | 1 | 1 | 1 | 1 | 1 | 1 | 0 | 0  |
| 19 | productive inf/ non-<br>--<br>prod VN                       | 1 | 1 | 1 | 1 | 1 | 1 | 1 | 1 | 1 | 1 | 0 | 0  |
| 20 | V in coordinate<br>clauses: converb or<br>fully inflected V | 1 | 1 | 1 | 1 | 1 | 1 | 1 | 1 | 1 | 1 | 0 | .5 |

|    |                              |  |         |         |            |         |         |           |         |         |         |         |          |         |
|----|------------------------------|--|---------|---------|------------|---------|---------|-----------|---------|---------|---------|---------|----------|---------|
| 21 | NP vs. VP coordination       |  | 1       | 1       | 1          | 1       | 1       | 1         | 1       | 1       | 1       | 0       | 0        | 0       |
| 22 | Rel marker                   |  | 1       | 1       | 1          | 1       | 1       | 1         | 1       | 0       | 1       | 1       | 0        | 1       |
| 23 | productive active participle |  | 1       | 1       | 1          | 1       | 1       | 1         | 1       | 1       | 1       | 1       | 1        | 1       |
| 24 | Q---particle in yes/no Qs    |  | 0       | 0       | 0          | 0       | 0       | 0         | 0       | 0       | 0       | 0       | 0        | 0       |
| 25 | wh---position                |  | 1       | 0       | 1          | 1       | 1       | 1         | 1       | 1       | 1       | 0       | 0        | 0       |
|    | %shared                      |  | 0.74    | 0.84    | 0.88       | 0.84    | 0.76    | 0.84      | 0.86    | 0.78    | 0.74    | 0.76    | 0.44     | 0.341   |
|    | 1.4 root                     |  | .81     | .88     | .91        | .88     | .82     | .88       | 0.90    | .84     | .81     | .82     | .56      | .46     |
|    |                              |  | Mor Mlt | Mor Cai | Mor--- Dms | Mor Skh | Mor irq | Mor AqArb | Mor Glf | Mor Ymn | Mor Cyp | Mor Nig | Mor Nubi | Mor Bux |

Table 3 Interdialectal comparison of syntactic features, continued

|    |                                           | Mlt Cai | Mlt Dms | Mlt Skh | Mlt Irq | Mlt AqArb | Mlt Cyp | Mlt Glf | Mlt Ymn | Mlt Nig | Mlt nubi | Mlt Bux |
|----|-------------------------------------------|---------|---------|---------|---------|-----------|---------|---------|---------|---------|----------|---------|
| 1  | V&S                                       | 0       | 0       | 0       | 1       | 0         | 0       | 1       | 1       | 0       | 1        | 1       |
| 2  | V&O                                       | 1       | 1       | 1       | 1       | 1         | 1       | 1       | 1       | 1       | 1        | 0       |
| 3  | N&A                                       | 1       | 1       | 1       | 1       | 1         | 1       | 1       | 1       | 1       | 1        | 1       |
| 4  | N&G                                       | 1       | 1       | 1       | 1       | 1         | 1       | 1       | 1       | 1       | 1        | .5      |
| 5  | N&Rel                                     | 1       | 1       | 1       | 1       | 1         | 1       | 1       | 1       | 1       | 1        | 0       |
| 6  | Prep/Post                                 | 1       | 1       | 1       | 1       | 1         | 1       | 1       | 1       | 1       | 1        | 1       |
| 7  | N&Dem                                     | 0       | 1       | 0       | 1       | 1         | 1       | 1       | .5      | 0       | 0        | 1       |
| 8  | def art                                   | .5      | 1       | 1       | 1       | .5        | 1       | .5      | .5      | .5      | 0        | 0       |
| 9  | morph marking of V arg cases              | 0       | 0       | 0       | 0       | 0         | 1       | 0       | 0       | .5      | 0        | .25     |
| 10 | gen phrase<br>gp gen particle gc gen case | 1       | 1       | 1       | 1       | .5        | .0      | 1       | 1       | 1       | 1        | .67     |

|    |                    |   |   |   |   |   |   |   |   |   |   |   |
|----|--------------------|---|---|---|---|---|---|---|---|---|---|---|
| 11 | grammatical gender | 1 | 1 | 1 | 1 | 1 | 1 | 1 | 1 | 1 | 0 | 1 |
|----|--------------------|---|---|---|---|---|---|---|---|---|---|---|



|    |                                                       |   |   |    |    |    |    |    |   |   |    |    |
|----|-------------------------------------------------------|---|---|----|----|----|----|----|---|---|----|----|
| 12 | copula, V or other                                    | 1 | 1 | .5 | .5 | .5 | .5 | 1  | 1 | 1 | 1  | 1  |
| 13 | existential, V or other                               | 1 | 1 | 0  | 0  | 1  | 1  | 1  | 1 | 1 | 0  | 0  |
| 14 | existential--- relational "have"                      | 0 | 0 | 0  | 0  | 0  | 1  | 0  | 0 | 0 | 1  | 0  |
| 15 | TAM particles                                         | 0 | 0 | 0  | 0  | 0  | 0  | .5 | 0 | 0 | 0  | .5 |
| 16 | inflected aux dominating inflected main V             | 1 | 0 | 1  | 1  | 1  | 1  | 1  | 1 | 0 | .5 | 0  |
| 17 | position of verbal negation                           | 1 | 0 | .5 | 0  | 0  | 0  | 0  | 1 | 0 | 0  | 0  |
| 18 | V in comp clauses, inf or inflected V                 | 1 | 1 | 1  | 1  | 1  | 1  | 1  | 1 | 1 | 0  | 0  |
| 19 | productive inf/ non--- prod VN                        | 1 | 1 | 1  | 1  | 1  | 1  | 1  | 1 | 1 | 0  | 0  |
| 20 | V in coordinate clauses: converb or fully inflected V | 1 | 1 | 1  | 1  | 1  | 1  | 1  | 1 | 1 | 0  | 1  |
| 21 | NP vs. VP coordination                                | 1 | 1 | 1  | 1  | 1  | 1  | 1  | 1 | 0 | 0  | 0  |
| 22 | Rel marker                                            | 1 | 1 | 1  | 1  | 1  | 1  | 1  | 1 | 1 | 1  | 1  |
| 23 | productive active participle                          | 1 | 1 | 1  | 1  | 1  | 1  | 1  | 1 | 1 | 0  | 1  |
| 24 | Q---particle in yes/no Qs                             | 1 | 1 | 0  | 1  | 1  | 1  | 1  | 1 | 0 | 1  | 0  |

|    |               |            |         |         |         |                  |            |             |            |               |                |            |
|----|---------------|------------|---------|---------|---------|------------------|------------|-------------|------------|---------------|----------------|------------|
| 25 | wh---position | 0          | 1       | 1       | 1       | 1                | 1          | 1           | .5         | 0             | 0              | 0          |
|    | %shared       | 0.74       | 0.76    | 0.68    | 0.78    | 0.74             | 0.82       | 0.84        | 0.82       | 0.6           | 0.46           | 0.44       |
|    | 1.4 root      | .81        | .82     | .76     | .84     | .81              | .87        | .88         | .87        | .69           | .57            | .56        |
|    |               | Mlt<br>Cai | Mlt Dms | Mlt Irq | Mlt Irq | Mlt<br>AqAr<br>b | Mlt<br>Cyp | Mlt<br>Glif | Mlt<br>Ymn | Mlt---<br>Nig | Mlt---<br>Nubi | Mlt<br>Bux |

Table 4 Interdialectal comparison continued

|    |                                              | Cai<br>Dms | Cai<br>Skh | Cai<br>Irq | Cai<br>Aq<br>Ar<br>b | Cai<br>Cyp | Cai<br>Glif | Cai Ymn | Cai Nig | Cai. nubi | Cai Bux |
|----|----------------------------------------------|------------|------------|------------|----------------------|------------|-------------|---------|---------|-----------|---------|
| 1  | V&S                                          | 1          | 0          | 1          | 1                    | 1          | 0           | 0       | 1       | 0         | 0       |
| 2  | V&O                                          | 1          | 1          | 1          | 1                    | 1          | 1           | 1       | 1       | 1         | 0       |
| 3  | N&A                                          | 1          | 1          | 1          | 1                    | .5         | 1           | 1       | 1       | 1         | 1       |
| 4  | N&G                                          | 1          | 1          | 1          | 1                    | 1          | 1           | 1       | 1       | 1         | .5      |
| 5  | N&Rel                                        | 1          | 1          | 1          | 1                    | 1          | 1           | 1       | 1       | 1         | 0       |
| 6  | Prep/Post                                    | 1          | 1          | 1          | 1                    | 1          | 1           | 1       | 1       | 1         | 1       |
| 7  | N&Dem                                        | 0          | 1          | 0          | 0                    | 1          | 0           | .5      | 1       | 1         | 0       |
| 8  | def art                                      | 1          | 1          | 1          | 1                    | .5         | 1           | 1       | 1       | 0         | 0       |
| 9  | morph marking of V arg cases                 | 1          | 1          | 1          | 1                    | 0          | 1           | 1       | .5      | 1         | .5      |
| 10 | gen phrase<br>gp gen particle gc<br>gen case | 1          | 1          | 1          | 1                    | 1          | 1           | .5      | 1       | 1         | .5      |
| 11 | grammatical gender                           | 1          | 1          | 1          | 1                    | 1          | 1           | 1       | 1       | 0         | 1       |
| 12 | copula, V or other                           | 1          | .5         | .5         | 0                    | 0          | .5          | .5      | .5      | 1         | 1       |
| 13 | existential, V or other                      | 1          | 1          | 1          | 1                    | 1          | 1           | 1       | 1       | 1         | 0       |
| 14 | existential---relational "have"              | 1          | 1          | 1          | 0                    | 1          | 1           | 1       | 1       | 0         | 1       |
| 15 | TAM particles                                | 1          | 1          | 1          | 1                    | 1          | .5          | 1       | .5      | 1         | .5      |
| 16 | inflected aux dominating inflected main V    | 1          | 1          | 1          | 1                    | 1          | 1           | 1       | 1       | 0         | 0       |
| 17 | position of verbal negation                  | 0          | .5         | 0          | 0                    | 0          | 0           | 1       | 0       | 0         | 0       |

|    |                                                       |   |   |   |   |   |   |   |   |   |   |
|----|-------------------------------------------------------|---|---|---|---|---|---|---|---|---|---|
|    |                                                       |   |   |   |   |   |   |   |   |   |   |
| 18 | V in comp clauses, inf or inflected V                 | 1 | 1 | 1 | 1 | 1 | 1 | 1 | 1 | 0 | 0 |
| 19 | productive inf/ non---prod VN                         | 1 | 1 | 1 | 1 | 1 | 1 | 1 | 1 | 0 | 0 |
| 20 | V in coordinate clauses: converb or fully inflected V | 1 | 1 | 1 | 1 | 1 | 1 | 1 | 1 | 0 | 1 |

|    |                              |                |            |            |                      |            |             |         |         |              |         |
|----|------------------------------|----------------|------------|------------|----------------------|------------|-------------|---------|---------|--------------|---------|
| 21 | NP vs. VP coordination       | 1              | 1          | 1          | 1                    | 1          | 1           | 1       | 0       | 0            | 0       |
| 22 | Rel marker                   | 1              | 1          | 1          | 1                    | 1          | 1           | 1       | 1       | 1            | 1       |
| 23 | productive active participle | 1              | 1          | 1          | 1                    | 1          | 1           | 1       | 1       | 0            | 1       |
| 24 | Q---particle in yes/no Qs    | 1              | 0          | 1          | 1                    | 1          | 1           | 1       | 0       | 1            | 0       |
| 25 | wh---position                | 0              | 0          | 0          | 0                    | 1          | 0           | .5      | 0       | 0            | 0       |
|    | %retained                    | 0.88           | 0.84       | 0.86       | 0.8                  | 0.84       | 0.8         | 0.88    | 0.78    | 0.52         | 0.4     |
|    | 1.4 root                     | .91            | .88        | .90        | .85                  | .88        | .85         | .91     | .84     | .63          | .52     |
|    |                              | Cai<br>D<br>ms | Cai<br>Skh | Cai<br>Irq | Cai<br>Aq<br>Ar<br>b | Cyp<br>Cai | Cai<br>Glfi | Cai Ymn | Cai Nig | Cai.<br>nubi | Cai Bux |

Table 5 Interdialectal comparison continued

|    |                                                    | Dms<br>Skh | Dms<br>Irq | Dms<br>AqArb | Dms<br>Cyp | Dms<br>Glfi | Dms<br>Ymn | Dms<br>Nig | Dms<br>Nubi | Dms<br>Bux |
|----|----------------------------------------------------|------------|------------|--------------|------------|-------------|------------|------------|-------------|------------|
| 1  | V&S                                                | 0          | 1          | 1            | 1          | 0           | 0          | 1          | 0           | 0          |
| 2  | V&O                                                | 1          | 1          | 1            | 1          | 1           | 1          | 1          | 1           | 0          |
| 3  | N&A                                                | 1          | 1          | 1            | .5         | 1           | 1          | 1          | 1           | 1          |
| 4  | N&G                                                | 1          | 1          | 1            | 1          | 1           | 1          | 1          | 1           | .5         |
| 5  | N&Rel                                              | 1          | 1          | 1            | 1          | 1           | 1          | 1          | 1           | 0          |
| 6  | Prep/Post                                          | 1          | 1          | 1            | 1          | 1           | 1          | 1          | 1           | 1          |
| 7  | N&Dem                                              | 1          | 1          | 1            | 1          | 0           | .5         | 0          | 0           | 1          |
| 8  | def art                                            | 1          | 1          | 1            | .5         | 1           | 1          | 1          | 0           | 0          |
| 9  | morph<br>marking<br>of<br>V arg cases              | 1          | 1          | 1            | 0          | 1           | 1          | 1          | 1           | .5         |
| 10 | gen<br>phrase<br>gp gen<br>particle<br>gc gen case | 1          | 1          | .5           | .0         | 1           | 1          | 1          | 1           | .67        |
| 11 | grammatical<br>gender                              | 1          | 1          | 1            | 1          | 1           | 1          | 1          | 0           | 1          |

|    |                          |   |    |    |    |   |   |   |   |   |
|----|--------------------------|---|----|----|----|---|---|---|---|---|
| 12 | copula, V<br>or<br>other | 1 | .5 | .5 | .5 | 1 | 1 | 1 | 1 | 1 |
|----|--------------------------|---|----|----|----|---|---|---|---|---|

|    |                                                                      |   |   |   |    |    |   |    |    |    |
|----|----------------------------------------------------------------------|---|---|---|----|----|---|----|----|----|
| 13 | existential,<br>V or other                                           | 1 | 1 | 1 | 1  | 1  | 1 | 1  | 1  | 0  |
| 14 | existential-<br>-- relational<br>"have"                              | 1 | 1 | 0 | .5 | 1  | 1 | 1  | 0  | 1  |
| 15 | TAM<br>particles                                                     | 1 | 1 | 1 | 1  | 1  | 1 | .5 | 1  | .5 |
| 16 | inflected<br>aux<br>dominating<br>inflected<br>main V                | 1 | 1 | 1 | 1  | 1  | 1 | 1  | 1  | 0  |
| 17 | position of<br>verbal<br>negation                                    | 1 | 1 | 1 | 1  | .5 | 0 | 1  | .5 | 1  |
| 18 | V in<br>comp claus<br>es, inf or<br>inflected V                      | 1 | 1 | 1 | 1  | 1  | 1 | 1  | 1  | 0  |
| 19 | productive<br>inf/ non-<br>--<br>prod VN                             | 1 | 1 | 1 | 1  | 1  | 1 | 1  | 0  | 0  |
| 20 | V in<br>coordinate<br>clauses:<br>converb<br>or fully<br>inflected V | 1 | 1 | 1 | 1  | 1  | 1 | 1  | 1  | 1  |
| 21 | NP vs.<br>VP<br>coordinatio<br>n                                     | 1 | 1 | 1 | 1  | 1  | 1 | 0  | 0  | 0  |

|    |                                    |   |   |   |   |   |   |   |   |   |
|----|------------------------------------|---|---|---|---|---|---|---|---|---|
| 22 | Rel marker                         | 1 | 1 | 1 | 1 | 1 | 1 | 1 | 1 | 1 |
| 23 | productive<br>active<br>participle | 1 | 1 | 1 | 1 | 1 | 1 | 1 | 0 | 1 |
| 24 | Q---particle<br>in                 | 1 | 1 | 1 | 1 | 0 | 1 | 0 | 1 | 0 |

|    |               |            |            |             |            |         |            |            |             |            |
|----|---------------|------------|------------|-------------|------------|---------|------------|------------|-------------|------------|
|    | yes/no Qs     |            |            |             |            |         |            |            |             |            |
| 25 | wh---position | 1          | 1          | 1           | 1          | 1       | .5         | 0          | 0           | 0          |
|    | %retained     | 0.96       | 0.98       | 0.92        | 0.84       | 0.86    | 0.88       | 0.82       | 0.62        | 0.49       |
|    | 1.4 root      | .97        | .99        |             |            |         |            |            |             |            |
|    |               | Dms<br>Skh | Dms<br>Irq | Dms<br>AqAr | Dms<br>Cyp | DmsGlif | Dms<br>Ymn | Dms<br>Nig | Dms<br>nubi | Dms<br>Bux |
|    |               |            |            |             |            |         |            |            |             |            |
|    |               |            |            |             |            |         |            |            |             |            |

Table 6 Interdialectal comparison continued

|    |                                                  | Skh<br>Irq | Skh<br>AqArb | Skh<br>Cyp | Skh<br>Glif | Skh<br>Ymn | Skh<br>Nig | Skh<br>Nubi | Skh<br>Bux | Irq<br>AqArb | Irq<br>Cyp | Irq<br>Glif | Irq<br>Ymn | Irq<br>Nig | Irq<br>Nubi | Irq<br>Bux |
|----|--------------------------------------------------|------------|--------------|------------|-------------|------------|------------|-------------|------------|--------------|------------|-------------|------------|------------|-------------|------------|
| 1  | V&S                                              | 0          | 0            | 0          | 1           | 1          | 0          | 1           | 1          | 1            | 1          | 0           | 0          | 1          | 0           | 0          |
| 2  | V&O                                              | 1          | 1            | 1          | 1           | 1          | 1          | 1           | 0          | 1            | 1          | 1           | 1          | 1          | 1           | 0          |
| 3  | N&A                                              | 1          | 1            | .5         | 1           | 1          | 1          | 1           | 1          | 1            | .5         | 1           | 1          | 1          | 1           | 1          |
| 4  | N&G                                              | 1          | 1            | 1          | 1           | 1          | 1          | 1           | .5         | 1            | 1          | 1           | 1          | 1          | 1           | .5         |
| 5  | N&Rel                                            | 1          | 1            | 1          | 1           | 1          | 1          | 1           | 0          | 1            | 1          | 1           | 1          | 1          | 1           | 0          |
| 6  | Prep/Post                                        | 1          | 1            | 1          | 1           | 1          | 1          | 1           | 1          | 1            | 1          | 1           | 1          | 1          | 1           | 1          |
| 7  | N&Dem                                            | 0          | 0            | 0          | 0           | .5         | 1          | 1           | 0          | 1            | 1          | 1           | .5         | 0          | 0           | 1          |
| 8  | def art                                          | 1          | 1            | .5         | 1           | 1          | 1          | 0           | 0          | 1            | 1          | 1           | 1          | 1          | 0           | 0          |
| 9  | morph marking of V arg cases                     | 1          | 1            | 0          | 1           | 1          | .5         | 1           | .5         | 1            | 0          | 1           | 1          | .5         | 1           | 1          |
| 10 | gen phrase:<br>gp gen<br>particle<br>gc gen case | 1          | .25          | .67        | 1           | 1          | 1          | 1           | .67        | .25          | .5         | 1           | 1          | 1          | 1           | .67        |
| 11 | grammatical gender                               | 1          | 1            | 1          | 1           | 1          | 1          | 0           | 1          | 1            | 1          | 1           | 1          | 1          | 0           | 1          |
| 12 | copula, V or other                               | 1          | 0            | 0          | 1           | .5         | 1          | 1           | 1          | 0            | 1          | 1           | .5         | 1          | 1           | 1          |
| 13 | existential, V or other                          | 1          | 1            | 1          | 1           | 1          | 1          | 1           | 0          | 1            | 1          | 1           | 1          | 1          | 1           | 0          |
| 14 | existential---relational "have"                  | 1          | 0            | 1          |             | 1          | 1          | 0           | 1          | 0            | 1          | 1           | 1          | 1          | 0           | 1          |
| 15 | TAM particles                                    | 1          | 1            | 1          | 1           | 1          | .5         | 1           | .5         | 1            | 1          | .5          | 1          | .5         | 1           | .5         |
| 16 | inflected aux dominating<br>inflected main V     | 1          | 1            | 1          | 1           | 1          | 1          | 0           | 0          | 1            | 1          | 1           | 1          | 1          | 0           | 0          |

|    |                             |    |    |    |    |    |   |     |    |   |   |   |   |   |    |   |
|----|-----------------------------|----|----|----|----|----|---|-----|----|---|---|---|---|---|----|---|
| 17 | position of verbal negation | .5 | .5 | .5 | .5 | .5 | 0 | .25 | .5 | 1 | 1 | 1 | 0 | 1 | .5 | 1 |
| 18 | V in comp clauses, inf or   | 1  | 1  | 1  | 1  | 1  | 1 | 0   | 0  | 1 | 1 | 1 | 1 | 1 | 0  | 0 |



|    |                                                       |                   |                 |            |             |            |            |             |            |                  |            |             |            |            |             |            |
|----|-------------------------------------------------------|-------------------|-----------------|------------|-------------|------------|------------|-------------|------------|------------------|------------|-------------|------------|------------|-------------|------------|
|    | inflectedV                                            |                   |                 |            |             |            |            |             |            |                  |            |             |            |            |             |            |
| 19 | productive inf/ non---prod VN                         | 1                 | 1               | 1          | 1           | 1          | 1          | 0           | 0          | 1                | 1          | 1           | 1          | 1          | 0           | 0          |
| 20 | V in coordinate clauses: converb or fully inflected V | 1                 | 1               | 1          | 1           | 1          | 1          | 1           | 1          | 1                | 1          | 1           | 1          | 1          | 1           | 1          |
| 21 | NP vs. VP coordination                                | 1                 | 1               | 1          | 1           | 1          | 0          | 0           | 0          | 1                | 1          | 1           | 1          | 0          | 0           | 0          |
| 22 | Rel marker                                            | 1                 | 1               | 1          | 1           | 1          | 1          | 1           | 1          | 1                | 1          | 1           | 1          | 1          | 1           | 1          |
| 23 | productive active participle                          | 1                 | 1               | 1          | 10.3        | 1          | 1          | 0           | 1          | 1                | 1          | 1           | 1          | 1          | 0           | 1          |
| 24 | Q---particle in yes/no Qs                             | 0                 | 0               | 0          | 0           | 0          | 0          | 0           | 0          | 1                | 1          | 1           | 1          | 0          | 1           | 0          |
| 25 | wh---position                                         | 1                 | 1               | 1          | 1           | .5         | 1          | 0           | 0          | 1                | 1          | 1           | .5         | 0          | 0           | 0          |
|    | %retained                                             | 0.86              | 0.75            | 0.73       | 0.75        | 0.88       | 0.8        | 0.57        | 0.47       | 0.89             | 0.92       | 0.94        | 0.86       | 0.8        | 0.54        | 0.51       |
|    | 1.4 root                                              |                   |                 |            |             |            |            |             |            |                  |            |             |            |            |             |            |
|    |                                                       | Skh-<br>--<br>Irq | Skh---<br>AqArb | Cyp<br>Skh | Skh<br>Glif | Ymn<br>Skh | Skh<br>Nig | Skh<br>nubi | Skh<br>Bux | Skh<br>Aq<br>Arb | Irq<br>Cyp | Irq<br>Glif | Irq<br>Ymn | Nig<br>Irq | nubi<br>Irq | Irq<br>Bux |

Table 7 Interdialectal comparison continued

|    |                                                 | AqArb<br>Cyp | AqArb<br>Gulf | AqArb<br>Ymn | AqArb<br>Nig | AqArb<br>Nubi | AqArb<br>Bux | Cyp<br>Glif | Cyp<br>Ymn | Cyp<br>Nig | Cyp<br>Nubi | Cyp<br>Bux |
|----|-------------------------------------------------|--------------|---------------|--------------|--------------|---------------|--------------|-------------|------------|------------|-------------|------------|
| 1  | V&S                                             | 1            | 0             | 0            | 1            | 0             | 0            | 0           | 0          | 1          | 0           | 0          |
| 2  | V&O                                             | 1            | 1             | 1            | 1            | 1             | 0            | 1           | 1          | 1          | 0           | 0          |
| 3  | N&A                                             | .5           | 1             | 1            | 1            | 1             | 0            | .5          | .5         | .5         | .5          | .5         |
| 4  | N&G                                             | 1            | 1             | 1            | 1            | 1             | .5           | 1           | 1          | 1          | 1           | .5         |
| 5  | N&Rel                                           | 1            | 1             | 1            | 1            | 1             | 0            | 1           | 1          | 1          | 1           | 0          |
| 6  | Prep/Post                                       | 1            | 1             | 1            | 1            | 1             | 1            | 1           | 1          | 1          | 1           | 1          |
| 7  | N&Dem                                           | 1            | 0             | .5           | 0            | 0             | .5           | 1           | .5         | 0          | 0           | 1          |
| 8  | def art                                         | 1            | 1             | 1            | 1            | 0             | 0            | 1           | .5         | .5         | 0           | 0          |
| 9  | morph marking of V arg cases                    | 0            | 1             | 1            | .5           | 1             | 1            | 0           | 0          | 0          | 0           | .5         |
| 10 | gen phrase<br>gp gen<br>particle<br>gc gen case | .25          | 1             | .5           | .5           | 1             | .15          | .5          | .5         | .5         | .5          | .5         |

|    |                    |   |   |   |   |   |   |   |    |    |   |   |
|----|--------------------|---|---|---|---|---|---|---|----|----|---|---|
|    |                    |   |   |   |   |   |   |   |    |    |   |   |
| 11 | grammatical gender | 1 | 1 | 1 | 1 | 0 | 1 | 1 | 1  | 1  | 0 | 1 |
| 12 | copula, V or other | 1 | 0 | 1 | 0 | 0 | 0 | 0 | .5 | .5 | 0 | 1 |

|    |                                                       |             |               |              |              |               |                 |             |            |            |             |            |
|----|-------------------------------------------------------|-------------|---------------|--------------|--------------|---------------|-----------------|-------------|------------|------------|-------------|------------|
| 13 | existential, V or other                               | 1           | 1             | 1            | 1            | 1             | 0               | 1           | 1          | 1          | 1           | 0          |
| 14 | existential---relational "have"                       | 0           | 0             | 0            | 0            | 1             | 0               | 1           | 1          | .5         | 0           | 1          |
| 15 | TAM particles                                         | 1           | 1             | 1            | .5           | 1             | 0               | .5          | 1          | .5         | 1           | .5         |
| 16 | inflected aux dominating inflected main V             | 1           | 1             | 1            | 1            | 0             | 0               | 1           | 1          | 1          | 0           | 0          |
| 17 | position of verbal negation                           | 1           | .5            | 0            | 1            | .5            | 1               | 1           | .0         | 1          | .5          | 1          |
| 18 | V in comp clauses, inf or inflected V                 | 1           | 1             | 1            | 1            | 0             | 0               | 1           | 1          | 1          | 0           | 0          |
| 19 | productive inf/ non---prod VN                         | 1           | 1             | 1            | 1            | 0             | 0               | 1           | 1          | 1          | 0           | 0          |
| 20 | V in coordinate clauses: converb or fully inflected V | 1           | 1             | 1            | 1            | 1             | 1               | 1           | 1          | 1          | 1           | 1          |
| 21 | NP vs. VP coordination                                | 1           | 1             | 1            | 0            | 0             | 0               | 1           | 1          | 0          | 0           | 0          |
| 22 | Rel marker                                            | 1           | 1             | 1            | 1            | 1             | .5              | 1           | 1          | 1          | 1           | 1          |
| 23 | productive active participle                          | 1           | 1             | 1            | 1            | 0             | 1               | 1           | 1          | 1          | 0           | 1          |
| 24 | Q---particle in yes/no Qs                             | 1           | 0             | 1            | 0            | 1             | 0               | 1           | 1          | 0          | 0           | 0          |
| 25 | wh---position                                         | 1           | 1             | .5           | 0            | 0             | 0               | 1           | .5         | 0          | 0           | 0          |
|    | %retained                                             | 0.87        | 0.78          | 0.82         | 0.7          | 0.54          | 0.31            | 0.82        | 0.76       | 0.64       | 0.34        | 0.46       |
|    | 1.4 root                                              |             |               |              |              |               |                 |             |            |            |             |            |
|    |                                                       | AqAr<br>Cyp | AqArb<br>Glfi | AqArb<br>Ymn | AqArb<br>Nig | AqArb<br>nubi | AqArb<br>Bux--- | Cyp<br>Glfi | Cyp<br>Ymn | Cyp<br>Nig | Cyp<br>Nubi | Cyp<br>Bux |

Table 8 Interdialectal comparison continued

|   |                       | Glfi<br>Ymn | Glfi<br>Nig | Glfi<br>Nubi | Glfi<br>Bux | Ymn<br>Nig | Ymn<br>Nubi | Ymn<br>Bux | Nig<br>Nubi | Nig<br>Bux | Nubi<br>Bux |
|---|-----------------------|-------------|-------------|--------------|-------------|------------|-------------|------------|-------------|------------|-------------|
| 1 | V&S                   | 1           | 0           | 1            | 1           | 0          | 1           | 1          | 0           | 0          | 1           |
| 2 | V&O                   | 1           | 1           | 1            | 0           | 1          | 1           | 0          | 1           | 0          | 0           |
| 3 | N&A                   | 1           | 1           | 1            | 1           | 1          | 1           | 1          | 1           | 1          | 1           |
| 4 | N&G                   | 1           | 1           | 1            | 1           | 1          | 1           | .5         | 1           | .5         | .5          |
| 5 | N&Rel                 | 1           | 1           | 1            | 0           | 1          | 1           | 0          | 1           | 0          | 0           |
| 6 | Prep/Post             | 1           | 1           | 1            | 1           | 1          | 1           | 1          | 1           | 1          | 1           |
| 7 | N&Dem                 | .5          | 1           | 0            | 1           | .05        | .5          | .5         | 1           | 0          | 0           |
| 8 | def art               | 1           | 1           | 0            | 0           | 1          | 0           | 0          | 0           | 0          | 0           |
| 9 | morph<br>marking of V | 1           | .5          | 1            | .5          | 1          | 1           | .5         | .5          | 1          | .5          |

|    |                                                    |    |     |    |     |    |    |     |    |     |     |
|----|----------------------------------------------------|----|-----|----|-----|----|----|-----|----|-----|-----|
|    | arg cases                                          |    |     |    |     |    |    |     |    |     |     |
| 10 | gen phrase<br>gp gen<br>particle<br>gc gen case    | 1  | 1   | 1  | .67 | 1  | .5 | .67 | .5 | .67 | 1   |
| 11 | grammatical<br>gender                              | 1  | 1   | 0  | 1   | 1  | 0  | 1   | 0  | 1   | 0   |
| 12 | copula, V<br>or<br>other                           | 1  | 1   | 1  | 1   | 1  | .5 | 1   | 1  | 1   | 1   |
| 13 | existential, V<br>or other                         | 1  | 1   | 1  | 0   | 1  | 1  | 0   | 1  | 0   | 0   |
| 14 | existential---<br>relational<br>“have”             | 1  | 1   | 0  | 1   | 1  | 0  | 1   | 0  | 1   | 0   |
| 15 | TAM particles                                      | .5 | .25 | .5 | .5  | .5 | 1  | .5  | .5 | 1   | .25 |
| 16 | inflected aux<br>dominating<br>inflected main<br>V | 1  | 1   | 0  | 0   | 1  | 0  | 0   | 1  | 0   | 0   |
| 17 | position of<br>verbal<br>negation                  | 1  | 1   | .5 | 1   | 1  | 0  | 0   | .5 | 1   | .5  |
| 18 | V in comp<br>clauses, inf<br>or<br>inflected V     | 1  | 1   | 0  | 0   | 1  | 0  | 0   | 0  | 0   | 0   |
| 19 | productive inf/<br>non--prod VN                    | 1  | 1   | 0  | 0   | 1  | 0  | 0   | 0  | 0   | 1   |
| 20 | V in<br>coordinate<br>clauses:<br>converb or       | 1  | 1   | 1  | 1   | 1  | 1  | 1   | 1  | 1   | 1   |

|    |                        |   |   |   |   |   |   |   |   |   |   |
|----|------------------------|---|---|---|---|---|---|---|---|---|---|
|    | fully inflectedV       |   |   |   |   |   |   |   |   |   |   |
| 21 | NP vs. VP coordination | 1 | 0 | 0 | 0 | 0 | 0 | 0 | 1 | 1 | 1 |
| 22 | Rel marker             | 1 | 1 | 1 | 1 | 1 | 1 | 1 | 1 | 1 | 1 |
| 23 | productive active      | 1 | 1 | 0 | 1 | 1 | 0 | 1 | 0 | 1 | 0 |

|    |                              |             |             |                  |                 |                |             |                |                 |            |                 |
|----|------------------------------|-------------|-------------|------------------|-----------------|----------------|-------------|----------------|-----------------|------------|-----------------|
|    | participle                   |             |             |                  |                 |                |             |                |                 |            |                 |
| 24 | Q---particle in<br>yes/no Qs | 1           | 0           | 1                | 0               | 0              | 0           | 0              | 0               | 1          | 0               |
| 25 | wh---position                | .5          | 1           | 0                | 0               | 0              | 0           | 0              | 1               | 0          | 0               |
|    | %retained                    | 0.94        | 0.83        | 0.56             | 0.55            | 0.78           | 0.5         | 0.47           | 0.6             | 0.57       | 0.43            |
|    | 1.4 root                     |             |             |                  |                 |                |             |                |                 |            |                 |
|    |                              | Ymn<br>Gl f | Gulf<br>Nig | Gl f<br>nu<br>bi | Gl f<br>Bu<br>x | Nig<br>Ym<br>n | nubi<br>Ymn | Bux<br>Ym<br>n | Nig<br>nub<br>i | Nig<br>Bux | Bux<br>nub<br>i |

## Summary

| dialect | Mlt | Mor | Cai | Dms | Skh | AqArb | Iraq | Gulf | Ymn | Nig | Cyp | Bux | Nubi | avg.<br>shared |
|---------|-----|-----|-----|-----|-----|-------|------|------|-----|-----|-----|-----|------|----------------|
| Mlt     | 0   | 74  | 74  | 76  | 76  | 74    | 78   | 84   | 82  | 60  | 82  | 44  | 46   | 65.38          |
| Mor     | 74  | 0   | 84  | 88  | 84  | 84    | 76   | 86   | 78  | 76  | 74  | 46  | 44   | 68.77          |
| Cai     | 74  | 84  | 0   | 88  | 84  | 80    | 86   | 80   | 88  | 78  | 84  | 40  | 62   | 71.38          |
| Dms     | 82  | 88  | 88  | 0   | 96  | 92    | 98   | 86   | 88  | 82  | 84  | 49  | 62   | 76.54          |
| Skh     | 76  | 82  | 84  | 96  | 0   | 75    | 86   | 75   | 88  | 80  | 73  | 47  | 57   | 70.69          |
| AqA     | 74  | 80  | 80  | 92  | 75  | 0     | 89   | 78   | 82  | 70  | 87  | 31  | 54   | 68.62          |
| Iraq    | 76  | 86  | 86  | 98  | 86  | 89    | 0    | 94   | 86  | 80  | 92  | 51  | 54   | 75.23          |
| Gulf    | 84  | 86  | 80  | 86  | 75  | 78    | 94   | 0    | 94  | 83  | 82  | 55  | 56   | 73.31          |
| Ymn     | 82  | 78  | 88  | 88  | 88  | 82    | 86   | 94   | 0   | 78  | 76  | 47  | 50   | 72.08          |
| Nig     | 60  | 67  | 78  | 82  | 80  | 70    | 80   | 83   | 78  | 0   | 64  | 57  | 60   | 66.08          |
| Cyp     | 82  | 74  | 84  | 84  | 73  | 87    | 92   | 82   | 76  | 64  | 0   | 46  | 34   | 67.54          |
| Bux     | 44  | 54  | 40  | 49  | 47  | 31    | 51   | 55   | 47  | 57  | 46  | 0   | 43   | 43.38          |
| Nbi     | 46  | 40  | 52  | 62  | 57  | 54    | 54   | 56   | 50  | 60  | 34  | 43  | 0    | 46.77          |
|         |     |     |     |     |     |       |      |      |     |     |     |     |      | 66.6           |
