# Supplementary material
Source: publisher figshare collection journal article supplement (https://brill.figshare.com/articles/dataset/_/11688558)
Supplement: Supplementary file 3 [file 1]

# Appendix 3a: Inflectional Morphology: Inter-dialectal comparison of inflectional verbal morphology and verbal object clitics

Note: As Nubi has lost all verbal inflectional morphology as well as pronominal clitics, the identity score for Nubi and each of the other dialects (except possibly Cypriot, which has also lost the pronominal object clitics, see below) is 0. I saw no need to represent this fact in detail. Hence comparison of all dialects, other than Cypriot, with Nubi is simply omitted in the comparative evaluation tables.

data

Table1

|          |     | CA        | Proto-diaAr | Mor  | Mlt  | Cai    | Dms  | Skh    | Irq    | AqArb  | Glfc   | Ymn    | Nig    | Cyp    | Bux    | Nub     |
|----------|-----|-----------|-------------|------|------|--------|------|--------|--------|--------|--------|--------|--------|--------|--------|---------|
| pref.con | 1s  | ʔa-       | (ʔ)a-ʔ      | n-   | ni-  | ʔa-    | 0    | a-     | a-     | a-     | a-     | ʔa-    | ba-    | 0      | ma-    | ‘ana    |
|          | 2ms | ta-       | tV-         | t-   | ti-  | ti-    | tʌ-  | ti-    | te-    | tʌ-    | ta-    | tu-    | tV-    | t/tt-  | tʌ-    | ‘ita    |
|          | 2fs | ta-ii(na) | tV-i        | t-i  | ti-  | ti-i   | tʌ-i | ti-in  | te-iin | tʌ-iin | ta-iin | tu-i   | tV—i   | t/tt—i | tʌ-iin | ‘ita    |
|          | 3ms | ya-       | yV-         | y-   | yi-  | yi-    | yʌ-  | yi-    | ye-    | yʌ-    | ya-    | yu-    | bi-    | y-     | mʌ-    | ‘uo     |
|          | 3fs | ta-       | tV-         | t-   | ti-  | ti-    | tʌ-  | ti-    | te-    | tʌ-    | ta-    | tu-    | tV-    | t/tt-  | tʌ-    | ‘uo     |
|          | 1p  | na-       | nV-ʔ        | n-u  | ni-u | ne-    | nʌ-  | ni-    | ne     | nʌ-    | na-    | nu-    | nV-    | n-     | nʌ     | ‘ina    |
|          | 2mp | ta-uu(na) | tV-u        | t-u  | ti-u | ti-u   | tʌ-u | ti-uun | te-uun | tʌ-uun | ta-uun | ta-u   | tV-u/o | t/tt—u | tʌ-uun | ‘itokum |
|          | 2fp | ta-na     | tV-an       | t-u  | ti-u | ti-u   | tʌ-u | ti-uun | te-uun | tʌ-uun | ta-an  | tu-ayn | tV-an  | t/tt—u | tʌ-in  | ‘itokum |
|          | 3mp | ya-uu(na) | yV-u        | y-u  | yi-u | yi-u   | yʌ-u | yi-uun | ye-uun | yʌ-uun | ya-uun | yu-u   | bi-u/o | y--u   | mʌ-uun | ‘umon   |
|          | 3fp | ya-na     | yV-an       | y-u  | yi-u | yi-u   | yʌ-u | yi-uun | ye-uun | yʌ-uun | ya-an  | yu-ayn | bi—an  | y--u   | mʌ-in  | ‘umon   |
| suf.con  | 1s  | -tu       | -t          | -t   | -t   | -t     | -t   | -t     | -t     | -tu    | -t     | -k     | -t     | -t     | -t     | ‘ana    |
|          | 2ms | -ta       | -t          | -ti  | -t   | -t     | -t   | -t     | -t     | -t     | -t     | -k     | -t     | -t     | -t     | ‘ita    |
|          | 2fs | -ti       | -ti         | -ti  | -t   | -ti    | -ti  | -ti    | -ti    | -ti    | -ti    | -ʃ     | -ti    | -ti    | -tii   | ‘ita    |
|          | 3ms | -a        | 0           | 0    | 0    | 0      | 0    | 0      | 0      | 0      | 0      | 0      | 0      | -0     | 0      | ‘uo     |
|          | 3fs | -at       | -Vt         | -it  | -et  | -it    | -et  | -at    | -at    | -ʌt    | -at    | -at    | -at    | -it    | -it    | ‘uo     |
|          | 1p  | -naa      | -na         | -na  | -na  | -na    | -na  | -na    | -na    | -na    | -na    | -na    | -na    | -na    | -naa   | ‘ina    |
|          | 2mp | -tum      | -tu         | -tu  | -tu  | -tu    | -tu  | -tu    | -tu    | -tʌm   | -tu    | -kum   | -tu    | -tu    | -tum   | ‘itokum |
|          | 2fp | -tunna    | -tu         | -tu  | -tu  | -tu    | -tu  | -tu    | -tu    | -tʌm   | -tin   | -kun   | -tan   | -tu    | -tin   | ‘itokum |
|          | 3mp | -uu       | -u          | -u   | -u   | -u     | -u   | -u     | -aw    | -u     | -aw    | -u     | -o     | -u     | -un    | ‘umon   |
|          | 3fp | -na       | -u          | -u   | -u   | -u     | -u   | -u     | -aw    | -u     | -an    | -an    | -an    | -u     | -in    | ‘umon   |
| vb.obj.  | 1s  | -nii      | -ni         | -ni  | -ni  | -ni    | -ni  | -ni    | -ni    | -ni    | -ni    | -niy   | -ni    | ana    | -nii   | ‘ana    |
|          | 2ms | -ka       | -ak         | -k   | -ek  | -ak    | -ak  | -ʃ     | -ak    | -k     | -ak    | -ak    | -ak    | int    | -ak    | ‘ita    |
|          | 2fs | -ki       | -ik         | -k   | -ek  | -ik    | -ik  | -ʃi    | -k     | -ki    | -iʃ    | -iʃ    | -ki    | inti   | -kii   | ‘ita    |
|          | 3ms | -hu       | -hu         | -h   | -h   | -u     | -h   | -u     | -u     | -hu    | -a     | -ih    | -a     | uo     | -h     | ‘uo     |
|          | 3fs | -haa      | -ha         | -ha  | -ha  | -ha    | -ha  | -ha    | -ha    | -ha    | -ha    | -ha    | -ha    | ie     | -aa    | ‘uo     |
|          | 1p  | -naa      | -na         | -na  | -na  | -na    | -na  | -na    | -na    | -na    | -ana   | -na    | -na    | naxni  | -naa   | ‘ina    |
|          | 2mp | -kum      | -kVm        | -kom | -kom | -ku(m) | -kon | -ʃu    | -kem   | -kʌm   | -kum   | -kum   | -ku    | intu   | -kum   | ‘itokum |
|          | 2fp | -kunna    | -kVm        | -kom | -kom | -ku(m) | -kon | -ʃu    | -kem   | -kʌm   | -kin   | -kin   | -kan   | intu   | -kin   | ‘itokum |
|          | 3mp | -hum      | -hVm        | -hom | -hom | -hum   | -hon | -ham   | -      | -hʌm   | -hum   | -hum   | -hum   | innen  | -hum   | ‘umon   |

|  |     |                 |                 |      |      |      |      |      |            |       |      |      |      |       |      |       |
|--|-----|-----------------|-----------------|------|------|------|------|------|------------|-------|------|------|------|-------|------|-------|
|  |     |                 |                 |      |      |      |      |      | (h)em      |       |      |      |      |       |      |       |
|  | 3fp | -hunna          | -hVm            | -hom | -hom | -hum | -hon | -ham | -<br>(h)em | -hæm  | hin  | -hin | -hin | innen | -hin | ‘umon |
|  |     | Proto-<br>diaAr | CA<br>PDA<br>-2 | Mor  | Mlt  | Cai  | Dms  | Skh  | Irq        | AqArb | Gulf | Ymn  | Nig  | Cyp   | Bux  | nubi  |

Table 2, inter-dialectal comparison

|          |     | CA              | Proto-<br>diaAr | Mor<br>Mlt | Mor<br>Cai | Mor<br>Dms | Mor<br>Skh- | Mor<br>Irq | Mor<br>AqArb | Mor<br>Glf- | Mor<br>Ymn | Mor<br>Nig. | Mor Cyp | Mor<br>Bux |
|----------|-----|-----------------|-----------------|------------|------------|------------|-------------|------------|--------------|-------------|------------|-------------|---------|------------|
| pref.con | 1s  | ?a-             | (?)a-?          | 1          | 0          | 0          | 0           | 0          | 0            | 0           | 0          | 0           | 0       | 0          |
|          | 2ms | ta-             | tV-             | 1          | 1          | 1          | 1           | 1          | 1            | 1           | 1          | 1           | 1       | 1          |
|          | 2fs | ta-ii(na)       | tV-i            | 0          | 1          | 1          | .75         | 0          | .75          | .75         | 1          | 1           | 1       | .75        |
|          | 3ms | ya-             | yV-             | 1          | 1          | 1          | 1           | 1          | 1            | 1           | 1          | 0           | 1       | 0          |
|          | 3fs | ta-             | tV-             | 1          | 1          | 1          | 1           | 1          | 1            | 1           | 1          | 1           | 1       | 1          |
|          | 1p  | na-             | nV-?            | 1          | 0          | 0          | 0           | 0          | 0            | 0           | 0          | 0           | 0       | 0          |
|          | 2mp | ta-uu(na)       | tV-u            | 1          | 1          | 1          | .75         | .75        | .75          | .75         | 1          | 1           | 1       | .75        |
|          | 2fp | ta-na           | tV-an           | 1          | 1          | 1          | .75         | .75        | .75          | 0           | 0          | 0           | 1       | 0          |
|          | 3mp | ya-<br>uu(na)   | yV-u            | 1          | 1          | 1          | .75         | .75        | .75          | .75         | 1          | .5          | 1       | 0          |
|          | 3fp | ya-na           | yV-an           | 1          | 1          | 1          | .75         | .75        | .75          | 0           | 0          | 0           | 1       | 0          |
| suf.con  | 1s  | -tu             | -t              | 1          | 1          | 1          | 1           | 1          | 0            | 1           | 0          | 1           | 1       | 1          |
|          | 2ms | -ta             | -t              | 0          | 0          | 0          | .5          | 0          | 0            | 1           | 0          | 0           | 0       | 0          |
|          | 2fs | -ti             | -ti             | 0          | 1          | 1          | 1           | 1          | 1            | 1           | 0          | 1           | 1       | 1          |
|          | 3ms | -a              | 0               | 1          | 1          | 1          | 1           | 1          | 1            | 1           | 1          | 1           | 1       | 1          |
|          | 3fs | -at             | -Vt             | 1          | 1          | 1          | 1           | 1          | 1            | 1           | 1          | 1           | 1       | 1          |
|          | 1p  | -naa            | -na             | 1          | 1          | 1          | 1           | 1          | 1            | 1           | 1          | 1           | 1       | 1          |
|          | 2mp | -tum            | -tu             | 1          | 1          | 1          | 1           | 1          | 0            | 1           | 0          | 1           | 1       | .5         |
|          | 2fp | -tunna          | -tu             | 1          | 1          | 1          | 1           | 1          | 0            | 0           | 0          | 0           | 1       | 0          |
|          | 3mp | -uu             | -u              | 1          | 1          | 1          | 1           | 1          | 1            | 1           | 1          | 1           | 1       | .5         |
|          | 3fp | -na             | -u              | 1          | 1          | 1          | 1           | 1          | 1            | 0           | 0          | 0           | 1       | 0          |
| vb.obj.  | 1s  | -nii            | -ni             | 1          | 1          | 1          | 1           | 1          | 1            | 1           | 1          | 1           | 0       | 1          |
|          | 2ms | -ka             | -ak             | 1          | 1          | 1          | 1           | 1          | 1            | 1           | .5         | .5          | 0       | 1          |
|          | 2fs | -ki             | -ik             | 1          | 0          | 0          | 0           | 0          | 0            | 0           | .5         | .5          | 0       | 0          |
|          | 3ms | -hu             | -hu             | 1          | 1          | 1          | 0           | 1          | 1            | 0           | 1          | 0           | 0       | 1          |
|          | 3fs | -haa            | -ha             | 1          | 1          | 1          | 1           | 1          | 1            | 1           | 1          | 1           | 0       | 1          |
|          | 1p  | -naa            | -na             | 1          | 1          | 1          | 1           | 1          | 1            | 1           | 1          | 1           | 0       | 1          |
|          | 2mp | -kum            | -kVm            | 1          | 1          | 0          | 1           | 1          | 1            | 1           | 1          | 1           | 0       | .5         |
|          | 2fp | -kunna          | -kVm            | 1          | 1          | 0          | 1           | 1          | 1            | 0           | 0          | 0           | 0       | 0          |
|          | 3mp | -hum            | -hVm            | 1          | 1          | 0          | 1           | 1          | 0            | 1           | 1          | 1           | 0       | 1          |
|          | 3fp | -hunna          | -hVm            | 1          | 1          | 0          | 1           | 1          | 0            | 0           | 0          | 0           | 0       | 0          |
|          |     | Proto-<br>diaAr | CA<br>PDA       | 0.9        | 0.87       | 0.73       | 0.81        | 0.8        | 0.68         | 0.64        | 0.57       | 0.58        | 0.57    | 0.53       |

|  |  |    |                 |            |            |            |             |            |              |             |            |             |         |            |
|--|--|----|-----------------|------------|------------|------------|-------------|------------|--------------|-------------|------------|-------------|---------|------------|
|  |  | CA | Proto-<br>diaAr | Mor<br>Mlt | Mor<br>Cai | Mor<br>Dms | Mor<br>Skh- | Mor<br>Irq | Mor<br>AqArb | Mor<br>GlF- | Mor<br>Ymn | Mor<br>Nig. | Mor Cyp | Mor<br>Bux |
|--|--|----|-----------------|------------|------------|------------|-------------|------------|--------------|-------------|------------|-------------|---------|------------|

|          |     | CA              | Proto-<br>diaAr | Mlt Cai | Mlt<br>Dms | Mlt Skh | Mlt Irq | Mlt AqArb | Mlt<br>GlF | Mlt<br>Ymn | Mlt<br>Nig. | Mlt<br>Cyp | Mlt Bux |
|----------|-----|-----------------|-----------------|---------|------------|---------|---------|-----------|------------|------------|-------------|------------|---------|
| pref.con | 1s  | ʔa-             | (?)a-?          | 0       | 0          | 0       | 0       | 0         | 0          | 0          | 0           | 0          | 0       |
|          | 2ms | ta-             | tV-             | 1       | 1          | 1       | 1       | 1         | 1          | 1          | 1           | 1          | 1       |
|          | 2fs | ta-ii(na)       | tV-i            | 0       | 0          | 0       | 0       | 0         | .75        | 0          | 0           | 1          | .75     |
|          | 3ms | ya-             | yV-             | 1       | 1          | 1       | 1       | 1         | 1          | 1          | 0           | 1          | 0       |
|          | 3fs | ta-             | tV-             | 1       | 1          | 1       | 1       | 1         | 1          | 1          | 1           | 1          | 1       |
|          | 1p  | na-             | nV-?            | 0       | 0          | 0       | 1       | 0         | 0          | 0          | 0           | 0          | 1       |
|          | 2mp | ta-<br>uu(na)   | tV-u            | 1       | 1          | .75     | .75     | .75       | .75        | 1          | 1           | 1          | .75     |
|          | 2fp | ta-na           | tV-an           | 1       | 1          | .75     | .75     | .75       | 0          | 0          | 0           | 1          | 0       |
|          | 3mp | ya-<br>uu(na)   | yV-u            | 1       | 1          | .75     | .75     | .75       | .75        | 1          | .5          | 1          | 0       |
|          | 3fp | ya-na           | yV-an           | 1       | 1          | .75     | .75     | .75       | 0          | 0          | 0           | 1          | 0       |
| suf.con  | 1s  | -tu             | -t              | 1       | 1          | 1       | 1       | 0         | 1          | 0          | 1           | 1          | 1       |
|          | 2ms | -ta             | -t              | 1       | 0          | 1       | 1       | 1         | 0          | 0          | 1           | 1          | 0       |
|          | 2fs | -ti             | -ti             | 0       | 0          | .5      | 0       | 0         | 0          | 0          | 0           | 0          | 0       |
|          | 3ms | -a              | 0               | 1       | 1          | 1       | 1       | 1         | 1          | 1          | 1           | 1          | 1       |
|          | 3fs | -at             | -Vt             | 1       | 1          | 1       | 1       | 1         | 1          | 1          | 1           | 1          | 1       |
|          | 1p  | -naa            | -na             | 1       | 1          | 1       | 1       | 1         | 1          | 1          | 1           | 1          | 1       |
|          | 2mp | -tum            | -tu             | 1       | 1          | 1       | 1       | 0         | 1          | 0          | 1           | 1          | .5      |
|          | 2fp | -tunna          | -tu             | 1       | 1          | 1       | 1       | 0         | 0          | 0          | 0           | 1          | 0       |
|          | 3mp | -uu             | -u              | 1       | 1          | 1       | 1       | 1         | 1          | 1          | 1           | 1          | .5      |
|          | 3fp | -na             | -u              | 1       | 1          | 1       | 1       | 1         | 0          | 0          | 0           | 1          | 0       |
| vb.obj.  | 1s  | -nii            | -ni             | 1       | 1          | 1       | 1       | 1         | 1          | 1          | 1           | 0          | 1       |
|          | 2ms | -ka             | -ak             | 1       | 1          | 1       | 1       | 1         | 1          | 1          | .5          | 0          | 1       |
|          | 2fs | -ki             | -ik             | 0       | 0          | 0       | 0       | 0         | 0          | 1          | .5          | 0          | 0       |
|          | 3ms | -hu             | -hu             | 1       | 1          | 0       | 1       | 1         | 0          | 1          | 0           | 0          | 1       |
|          | 3fs | -haa            | -ha             | 1       | 1          | 1       | 1       | 1         | 1          | 1          | 1           | 0          | 1       |
|          | 1p  | -naa            | -na             | 1       | 1          | 1       | 1       | 1         | 1          | 1          | 1           | 0          | 1       |
|          | 2mp | -kum            | -kVm            | 1       | 0          | 0       | 1       | 1         | 1          | 1          | 1           | 0          | .5      |
|          | 2fp | -kunna          | -kVm            | 1       | 0          | 0       | 1       | 1         | 0          | 0          | 0           | 0          | 0       |
|          | 3mp | -hum            | -hVm            | 1       | 0          | 1       | 1       | 1         | 1          | 1          | 1           | 0          | 1       |
|          | 3fp | -hunna          | -hVm            | 1       | 0          | 1       | 1       | 1         | 0          | 0          | 0           | 0          | 0       |
|          |     |                 |                 | 0.83    | 0.67       | 0.72    | 0.83    | 0.72      | 0.58       | 0.57       | 0.55        | 0.57       | 0.53    |
|          |     | Proto-<br>diaAr | CA<br>PDA<br>-2 | Mlt Cai | Mlt<br>Dms | Mlt Skh | Mlt Irq | Mlt AqArb | Mlt<br>GlF | Mlt<br>Ymn | Mlt<br>Nig. | Mlt<br>Cyp | Mlt Bux |

|  |  |    |        |     |         |         |           |         |     |     |         |         |
|--|--|----|--------|-----|---------|---------|-----------|---------|-----|-----|---------|---------|
|  |  | CA | Proto- | Cai | Cai Skh | Cai Irq | Cai AqArb | Cai Glf | Cai | Cai | Cai Cyp | Cai Bux |
|--|--|----|--------|-----|---------|---------|-----------|---------|-----|-----|---------|---------|

|          |     |             | diaAr     | Dms     |         |         |           |         | Ymn     | Nig.     |         |         |
|----------|-----|-------------|-----------|---------|---------|---------|-----------|---------|---------|----------|---------|---------|
| pref.con | 1s  | ?a-         | (?)a-?    | 0       | 1       | 1       | 1         | 1       | 1       | 0        | 0       | 0       |
|          | 2ms | ta-         | tV-       | 1       | 1       | 1       | 1         | 1       | 1       | 1        | 1       | 1       |
|          | 2fs | ta-ii(na)   | tV-i      | 1       | .75     | .75     | .75       | .75     | 1       | 1        | 1       | .75     |
|          | 3ms | ya-         | yV-       | 1       | 1       | 1       | 1         | 1       | 1       | 0        | 1       | 0       |
|          | 3fs | ta-         | tV-       | 1       | 1       | 1       | 1         | 1       | 1       | 1        | 1       | 1       |
|          | 1p  | na-         | nV-?      | 1       | 1       | 1       | 1         | 1       | 1       | 1        | 1       | 1       |
|          | 2mp | ta-uu(na)   | tV-u      | 1       | .75     | .75     | .75       | .75     | 1       | 1        | 1       | .75     |
|          | 2fp | ta-na       | tV-an     | 1       | .75     | .75     | .75       | 0       | 0       | 0        | 1       | 0       |
|          | 3mp | ya-uu(na)   | yV-u      | 1       | .75     | .75     | .75       | .75     | 1       | .5       | 1       | 0       |
|          | 3fp | ya-na       | yV-an     | 1       | .75     | .75     | .75       | 0       | 0       | 0        | 1       | 0       |
| suf.con  | 1s  | -tu         | -t        | 1       | 1       | 1       | 0         | 1       | 0       | 1        | 1       | 1       |
|          | 2ms | -ta         | -t        | 1       | 1       | 1       | 1         | 1       | 0       | 1        | 1       | 1       |
|          | 2fs | -ti         | -ti       | 1       | 1       | 1       | 1         | 1       | 0       | 1        | 1       | 1       |
|          | 3ms | -a          | 0         | 1       | 1       | 1       | 1         | 1       | 1       | 1        | 1       | 1       |
|          | 3fs | -at         | -Vt       | 1       | 1       | 1       | 1         | 1       | 1       | 1        | 1       | 1       |
|          | 1p  | -naa        | -na       | 1       | 1       | 1       | 1         | 1       | 1       | 1        | 1       | 1       |
|          | 2mp | -tum        | -tu       | 1       | 1       | 1       | 0         | 1       | 0       | 1        | 1       | .5      |
|          | 2fp | -tunna      | -tu       | 1       | 1       | 1       | 0         | 0       | 0       | 0        | 1       | 1       |
|          | 3mp | -uu         | -u        | 1       | 1       | 1       | 1         | 1       | 1       | 1        | 1       | .5      |
|          | 3fp | -na         | -u        | 1       | 1       | 1       | 1         | 0       | 0       | 0        | 1       | 0       |
| vb.obj.  | 1s  | -nii        | -ni       | 1       | 1       | 1       | 1         | 1       | 1       | 1        | 0       | 1       |
|          | 2ms | -ka         | -ak       | 1       | 1       | 1       | 1         | 1       | 1       | 1        | 0       | 1       |
|          | 2fs | -ki         | -ik       | 1       | .5      | 1       | 1         | 1       | 1       | 1        | 0       | 1       |
|          | 3ms | -hu         | -hu       | 1       | 1       | 1       | 1         | 0       | 1       | 0        | 0       | 1       |
|          | 3fs | -haa        | -ha       | 1       | 1       | 1       | 1         | 1       | 1       | 1        | 0       | 1       |
|          | 1p  | -naa        | -na       | 1       | 1       | 1       | 1         | 1       | 1       | 1        | 0       | 1       |
|          | 2mp | -kum        | -kVm      | 0       | 0       | 1       | 1         | 1       | 1       | 1        | 0       | 1       |
|          | 2fp | -kunna      | -kVm      | 0       | 0       | 1       | 1         | 0       | 0       | 0        | 0       | 0       |
|          | 3mp | -hum        | -hVm      | 0       | 1       | 1       | 1         | 1       | 1       | 1        | 0       | 1       |
|          | 3fp | -hunna      | -hVm      | 0       | 1       | 1       | 1         | 0       | 0       | 0        | 0       | 0       |
|          |     |             |           | 0.83    | 0.88    | 0.96    | 0.89      | 0.74    | 0.67    | 0.68     | 0.63    | 0.68    |
|          |     | Proto-diaAr | CA PDA -2 | Cai Dms | Cai Skh | Cai Irq | Cai AqArb | Cai Glf | Cai Ymn | Cai Nig. | Cai Cyp | Cai Bux |

|          |     | CA        | Proto-diaAr | Dms Skh | Dms Irq | Dms AqArb | Dms Glf | Dms Ymn | Dms Nig | Dms Cyp | Dms Bux |
|----------|-----|-----------|-------------|---------|---------|-----------|---------|---------|---------|---------|---------|
| pref.con | 1s  | ?a-       | (?)a-?      | 0       | 0       | 0         | 0       | 0       | 0       | 1       | 0       |
|          | 2ms | ta-       | tV-         | 1       | 1       | 1         | 1       | 1       | 1       | 1       | 1       |
|          | 2fs | ta-ii(na) | tV-i        | .75     | .75     | .75       | .75     | 1       | 1       | 1       | .75     |

|         |     |                 |           |         |         |              |            |            |            |            |            |
|---------|-----|-----------------|-----------|---------|---------|--------------|------------|------------|------------|------------|------------|
|         | 3ms | ya-             | yV-       | 1       | 1       | 1            | 1          | 1          | 0          | 1          | 0          |
|         | 3fs | ta-             | tV-       | 1       | 1       | 1            | 1          | 1          | 1          | 1          | 1          |
|         | 1p  | na-             | nV-?      | 1       | 1       | 1            | 1          | 1          | 1          | 1          | 1          |
|         | 2mp | ta-<br>uu(na)   | tV-u      | .75     | .75     | .75          | .75        | 1          | 1          | 1          | .75        |
|         | 2fp | ta-na           | tV-an     | .75     | .75     | .75          | 0          | 0          | 0          | 1          | 0          |
|         | 3mp | ya-<br>uu(na)   | yV-u      | .75     | .75     | .75          | .75        | 1          | .5         | 1          | 0          |
|         | 3fp | ya-na           | yV-an     | .75     | .75     | .75          | 0          | 0          | 0          | 1          | 0          |
| suf.con | 1s  | -tu             | -t        | 1       | 1       | 0            | 1          | 0          | 1          | 1          | 1          |
|         | 2ms | -ta             | -t        | 1       | 1       | 1            | 1          | 0          | 1          | 1          | 1          |
|         | 2fs | -ti             | -ti       | 1       | 1       | 1            | 1          | 0          | 1          | 1          | 1          |
|         | 3ms | -a              | 0         | 1       | 1       | 1            | 1          | 1          | 1          | 1          | 1          |
|         | 3fs | -at             | -Vt       | 1       | 1       | 1            | 1          | 1          | 1          | 1          | 1          |
|         | 1p  | -naa            | -na       | 1       | 1       | 1            | 1          | 1          | 1          | 1          | 1          |
|         | 2mp | -tum            | -tu       | 1       | 1       | 0            | 1          | 0          | 1          | 1          | .5         |
|         | 2fp | -tunna          | -tu       | 1       | 1       | 0            | 0          | 0          | 0          | 1          | 1          |
|         | 3mp | -uu             | -u        | 1       | 1       | 1            | 1          | 1          | 1          | 1          | .5         |
|         | 3fp | -na             | -u        | 1       | 1       | 1            | 0          | 0          | 0          | 1          | 0          |
| vb.obj. | 1s  | -nii            | -ni       | 1       | 1       | 1            | 1          | 1          | 1          | 0          | 1          |
|         | 2ms | -ka             | -ak       | 1       | 1       | 1            | 1          | 1          | 1          | 0          | 1          |
|         | 2fs | -ki             | -ik       | .5      | 1       | 1            | 1          | 1          | 1          | 0          | 1          |
|         | 3ms | -hu             | -hu       | 0       | 1       | 1            | 0          | 1          | 0          | 0          | 1          |
|         | 3fs | -haa            | -ha       | 1       | 1       | 1            | 1          | 1          | 1          | 0          | 1          |
|         | 1p  | -naa            | -na       | 1       | 1       | 1            | 1          | 1          | 1          | 0          | 1          |
|         | 2mp | -kum            | -kVm      | 0       | 0       | 1            | 0          | 1          | 1          | 0          | .5         |
|         | 2fp | -kunna          | -kVm      | 0       | 0       | 1            | 1          | 0          | 0          | 0          | 0          |
|         | 3mp | -hum            | -hVm      | 0       | 0       | 1            | 0          | 1          | 1          | 0          | .5         |
|         | 3fp | -hunna          | -hVm      | 0       | 0       | 1            | 1          | 0          | 0          | 0          | 0          |
|         |     |                 |           | 0.74    | 0.79    | 0.85         | 0.71       | 0.63       | 0.68       | 0.67       | 0.65       |
|         |     | Proto-<br>diaAr | CA<br>PDA | Dms Skh | Dms Irq | Dms<br>AqArb | Dms<br>GlF | Dms<br>Ymn | Dms<br>Nig | Dms<br>Cyp | Dms<br>Bux |

|          |     | CA            | Proto-<br>diaAr | Skh-<br>Irq | Skh-<br>AqAr | Skh-<br>GlF | Skh-<br>Ymn | Skh-<br>Nig | Skh-<br>Cyp | Skh<br>Bux |
|----------|-----|---------------|-----------------|-------------|--------------|-------------|-------------|-------------|-------------|------------|
| pref.con | 1s  | ʔa-           | (ʔ)a-?          | 1           | 1            | 1           | 1           | .5          | 0           | 0          |
|          | 2ms | ta-           | tV-             | 1           | 1            | 1           | 1           | 1           | 1           | 1          |
|          | 2fs | ta-ii(na)     | tV-i            | 1           | 1            | 1           | .75         | .75         | .75         | 1          |
|          | 3ms | ya-           | yV-             | 1           | 1            | 1           | 1           | .5          | 1           | 0          |
|          | 3fs | ta-           | tV-             | 1           | 1            | 1           | 1           | 1           | 1           | 1          |
|          | 1p  | na-           | nV-?            | 1           | 1            | 1           | 1           | 1           | 1           | 1          |
|          | 2mp | ta-<br>uu(na) | tV-u            | 1           | 1            | 1           | .75         | .75         | .75         | 1          |
|          | 2fp | ta-na         | tV-an           | 1           | 1            | 0           | 0           | 0           | .75         | 0          |

|         |     |                 |                 |             |              |         |             |         |             |            |
|---------|-----|-----------------|-----------------|-------------|--------------|---------|-------------|---------|-------------|------------|
|         | 3mp | ya-<br>uu(na)   | yV-u            | 1           | 1            | 1       | .75         | .5      | .75         | .5         |
|         | 3fp | ya-na           | yV-an           | 1           | 1            | 0       | 0           | 0       | .75         | 0          |
| suf.con | 1s  | -tu             | -t              | 1           | 0            | 1       | 0           | 1       | 1           | 1          |
|         | 2ms | -ta             | -t              | 1           | 1            | 1       | 0           | 1       | 1           | 1          |
|         | 2fs | -ti             | -ti             | 1           | 1            | 1       | 0           | 1       | 1           | 1          |
|         | 3ms | -a              |                 | 1           | 1            | 1       | 1           | 1       | 1           | 1          |
|         | 3fs | -at             | -Vt             | 1           | 1            | 1       | 1           | 1       | 1           | 1          |
|         | 1p  | -naa            | -na             | 1           | 1            | 1       | 1           | 1       | 1           | 1          |
|         | 2mp | -tum            | -tu             | 1           | 0            | 1       | 0           | 1       | 1           | .5         |
|         | 2fp | -tunna          | -tu             | 1           | 0            | 0       | 0           | 0       | 1           | 1          |
|         | 3mp | -uu             | -u              | 1           | 1            | 1       | 1           | 1       | 1           | .5         |
|         | 3fp | -na             | -u              | 1           | 1            | 0       | 0           | 0       | 1           | 0          |
| vb.obj. | 1s  | -nii            | -ni             | 1           | 1            | 1       | 1           | 1       | 1           | 1          |
|         | 2ms | -ka             | -ak             | 1           | 1            | .5      | .5          | .5      | .5          | 1          |
|         | 2fs | -ki             | -ik             | .5          | 1            | 1       | 1           | 1       | 1           | 1          |
|         | 3ms | -hu             | -hu             | 1           | 1            | 0       | 0           | 0       | 0           | 1          |
|         | 3fs | -haa            | -ha             | 1           | 1            | 1       | 1           | 1       | 1           | 1          |
|         | 1p  | -naa            | -na             | 1           | 1            | 1       | 1           | 1       | 0           | 1          |
|         | 2mp | -kum            | -kVm            | 0           | 0            | 0       | 0           | 1       | 0           | .5         |
|         | 2fp | -kunna          | -kVm            | 0           | 0            | 0       | 0           | 0       | 0           | 0          |
|         | 3mp | -hum            | -hVm            | 1           | 1            | 1       | 1           | 1       | 0           | 1          |
|         | 3fp | -hunna          | -hVm            | 0           | 1            | 0       | 0           | 0       | 0           | 0          |
|         |     |                 |                 | 0.88        | 0.83         | 0.72    | 0.56        | 0.68    | 0.71        | 0.7        |
|         |     | Proto-<br>diaAr | CA<br>PDA<br>-2 | Skh-<br>Irq | Skh-<br>AqAr | Skh-Glf | Skh-<br>Ymn | Skh-Nig | Skh-<br>Cyp | Skh<br>Bux |

|          |     |               |                 |           |         |            |         |         |         |
|----------|-----|---------------|-----------------|-----------|---------|------------|---------|---------|---------|
|          |     | CA            | Proto-<br>diaAr | Irq AqArb | Irq Glf | Irq<br>Ymn | Irq Nig | Irq Cyp | Irq Bux |
| pref.con | 1s  | ?a-           | (?)a-?          |           | 1       | 1          | 0       | 1       | 0       |
|          | 2ms | ta-           | tV-             | 1         | 1       | 1          | 1       | 1       | 1       |
|          | 2fs | ta-ii(na)     | tV-i            | 1         | 1       | .75        | .75     | 1       | 1       |
|          | 3ms | ya-           | yV-             | 1         | 1       | 1          | 0       | 1       | 0       |
|          | 3fs | ta-           | tV-             | 1         | 1       | 1          | 1       | 1       | 1       |
|          | 1p  | na-           | nV-?            | 1         | 1       | 1          | 1       | 1       | 1       |
|          | 2mp | ta-<br>uu(na) | tV-u            | 1         | 1       | .75        | .75     | .75     | 1       |
|          | 2fp | ta-na         | tV-an           | 1         | 0       | 0          | 0       | .75     | 0       |
|          | 3mp | ya-<br>uu(na) | yV-u            | 1         | 1       | .75        | .25     | .75     | .5      |
|          | 3fp | ya-na         | yV-an           | 1         | 0       | 0          | 0       | .75     | 0       |
| suf.con  | 1s  | -tu           | -t              | 1         | 1       | 0          | 1       | 1       | 1       |
|          | 2ms | -ta           | -t              | 0         | 1       | 0          | 1       | 1       | 1       |
|          | 2fs | -ti           | -ti             | 1         | 1       | 0          | 1       | 1       | 1       |

|         |     |             |      |           |         |         |         |         |         |
|---------|-----|-------------|------|-----------|---------|---------|---------|---------|---------|
|         | 3ms | -a          | 0    | 1         | 1       | 1       | 1       | 1       | 1       |
|         | 3fs | -at         | -Vt  | 1         | 1       | 1       | 1       | 1       | 1       |
|         | 1p  | -naa        | -na  | 1         | 1       | 1       | 1       | 1       | 1       |
|         | 2mp | -tum        | -tu  | 1         | 1       | 0       | 1       | 1       | .5      |
|         | 2fp | -tunna      | -tu  | 0         | 0       | 0       | 0       | 1       | 1       |
|         | 3mp | -uu         | -u   | 0         | 1       | 1       | 1       | 1       | .5      |
|         | 3fp | -na         | -u   | 1         | 0       | 0       | 0       | 1       | 0       |
| vb.obj. | 1s  | -nii        | -ni  | 1         | 1       | 1       | 1       | 0       | 1       |
|         | 2ms | -ka         | -ak  | 1         | 1       | 1       | 1       | 0       | 1       |
|         | 2fs | -ki         | -ik  | 1         | 1       | 1       | 1       | 0       | 1       |
|         | 3ms | -hu         | -hu  | 1         | 0       | 1       | 0       | 0       | 1       |
|         | 3fs | -haa        | -ha  | 1         | 1       | 1       | 1       | 0       | 1       |
|         | 1p  | -naa        | -na  | 1         | 1       | 1       | 1       | 0       | 1       |
|         | 2mp | -kum        | -kVm | 1         | 1       | 1       | 1       | 0       | 1       |
|         | 2fp | -kunna      | -kVm | 1         | 0       | 0       | 0       | 0       | 0       |
|         | 3mp | -hum        | -hVm | 1         | 1       | 1       | 1       | 0       | 1       |
|         | 3fp | -hunna      | -hVm | 1         | 0       | 0       | 0       | 0       | 0       |
|         |     |             |      | 0.87      | 0.77    | 0.64    | 0.66    | 0.63    | 0.72    |
|         |     | Proto-diaAr | CA   | Irq AqArb | Irq Glf | Irq Ymn | Irq Nig | Irq Cyp | Irq Bux |

|          |     | CA        | Proto-diaAr | AqArb Glf | AqArb Ymn | AqArb Nig | AqArb Cyp | AqArb Bux |
|----------|-----|-----------|-------------|-----------|-----------|-----------|-----------|-----------|
| pref.con | 1s  | ?a-       | (?)a-?      |           |           |           |           | 0         |
|          | 2ms | ta-       | tV-         | 1         | 1         | 0         | 0         | 1         |
|          | 2fs | ta-ii(na) | tV-i        | 1         | 1         | 1         | 1         | 1         |
|          | 3ms | ya-       | yV-         | 1         | .75       | .75       | .75       | 0         |
|          | 3fs | ta-       | tV-         | 1         | 1         | 0         | 1         | 1         |
|          | 1p  | na-       | nV-?        | 1         | 1         | 1         | 1         | 1         |
|          | 2mp | ta-uu(na) | tV-u        | 1         | 1         | 1         | 1         | 1         |
|          | 2fp | ta-na     | tV-an       | 1         | .75       | .75       | .75       | 0         |
|          | 3mp | ya-uu(na) | yV-u        | 0         | 0         | 0         | .75       | .5        |
|          | 3fp | ya-na     | yV-an       | 1         | .75       | 0         | .75       | 0         |
| suf.con  | 1s  | -tu       | -t          | 0         | 0         | 0         | .75       | 0         |
|          | 2ms | -ta       | -t          | 0         | 0         | 0         | 0         | 1         |
|          | 2fs | -ti       | -ti         | 1         | 0         | 1         | 1         | 1         |
|          | 3ms | -a        | 0           | 1         | 1         | 1         | 1         | 1         |
|          | 3fs | -at       | -Vt         | 1         | 1         | 1         | 1         | 1         |
|          | 1p  | -naa      | -na         | 1         | 1         | 1         | 1         | 1         |
|          | 2mp | -tum      | -tu         | 1         | 1         | 1         | 1         | 1         |
|          | 2fp | -tunna    | -tu         | 0         | 0         | 0         | 0         | 0         |
|          | 3mp | -uu       | -u          | 0         | 0         | 0         | 0         | .5        |
|          | 3fp | -na       | -u          | 1         | 1         | 1         | 1         | 0         |
| vb.obj.  | 1s  | -nii      | -ni         | 0         | 0         | 0         | 1         | 1         |
|          | 2ms | -ka       | -ak         | 1         | 1         | 1         | 0         | 1         |

|  |     |             |      |           |           |           |           |           |
|--|-----|-------------|------|-----------|-----------|-----------|-----------|-----------|
|  | 2fs | -ki         | -ik  | 1         | 1         | 1         | 0         | 1         |
|  | 3ms | -hu         | -hu  | 1         | 1         | 1         | 0         | 1         |
|  | 3fs | -haa        | -ha  | 0         | 1         | 0         | 0         | 1         |
|  | 1p  | -naa        | -na  | 1         | 1         | 1         | 0         | 1         |
|  | 2mp | -kum        | -kVm | 1         | 1         | 1         | 0         | 1         |
|  | 2fp | -kunna      | -kVm | 1         | 1         | 1         | 0         | 0         |
|  | 3mp | -hum        | -hVm | 0         | 0         | 0         | 0         | 1         |
|  | 3fp | -hunna      | -hVm | 0         | 1         | 1         | 0         | 0         |
|  |     |             |      | 0         | 0         | 0         | 0         | 0.67      |
|  |     | Proto-diaAr | CA   | 0.69      | 0.7       | 0.6       | 0.49      | 0         |
|  |     |             |      | AqArb Glf | AqArb Ymn | AqArb Nig | AqArb Cyp | Bux AqArb |

|          |     | CA        | ProtodiaAr | Glf Ymn | Glf Nig | Glf Cyp | Glf Bux | Ymn Nig | Ymn Bux | YmnCyp |
|----------|-----|-----------|------------|---------|---------|---------|---------|---------|---------|--------|
| pref.con | 1s  | ?a-       | (?)a-?     | 1       | 0       | 0       | 0       | 0       | 0       |        |
|          | 2ms | ta-       | tV-        | 1       | 1       | 1       | 1       | 1       | 1       |        |
|          | 2fs | ta-ii(na) | tV-i       | .75     | .75     | 1       | 1       | 1       | .75     |        |
|          | 3ms | ya-       | yV-        | 1       | 0       | 1       | 0       | 0       | 0       |        |
|          | 3fs | ta-       | tV-        | 1       | 1       | 1       | 1       | 1       | 1       |        |
|          | 1p  | na-       | nV-?       | 1       | 1       | 1       | 1       | 1       | 1       |        |
|          | 2mp | ta-uu(na) | tV-u       | .75     | .75     | .75     | 1       | 1       | .75     |        |
|          | 2fp | ta-na     | tV-an      | 1       | 1       | 0       | 1       | 1       | 1       |        |
|          | 3mp | ya-uu(na) | yV-u       | .75     | 0       | .75     | .5      | .5      | 0       |        |
|          | 3fp | ya-na     | yV-an      | 1       | .5      | 0       | .5      | .5      | .5      |        |
| suf.con  | 1s  | -tu       | -t         | 0       | 1       | 1       | 1       | 0       | 0       |        |
|          | 2ms | -ta       | -t         | 0       | 1       | 1       | 1       | 0       | 0       |        |
|          | 2fs | -ti       | -ti        | 0       | 1       | 1       | 1       | 0       | 0       |        |
|          | 3ms | -a        | 0          | 1       | 1       | 1       | 1       | 1       | 1       |        |
|          | 3fs | -at       | -Vt        | 1       | 1       | 1       | 1       | 1       | 1       |        |
|          | 1p  | -naa      | -na        | 1       | 1       | 1       | 1       | 1       | 1       |        |
|          | 2mp | -tum      | -tu        | 0       | 1       | 1       | .5      | 0       | .5      |        |
|          | 2fp | -tunna    | -tu        | 0       | 1       | 0       | 1       | 0       | .5      |        |
|          | 3mp | -uu       | -u         | 1       | 1       | 1       | .5      | 1       | .5      |        |
|          | 3fp | -na       | -u         | 1       | 1       | 0       | 1       | 1       | 1       |        |
| vb.obj.  | 1s  | -nii      | -ni        | 1       | 1       | 0       | 1       | 1       | 1       |        |
|          | 2ms | -ka       | -ak        | 1       | 1       | 0       | 1       | 1       | 1       |        |
|          | 2fs | -ki       | -ik        | 1       | .5      | 0       | 1       | 1       | 1       |        |
|          | 3ms | -hu       | -hu        | 0       | 1       | 0       | 1       | 0       | 1       |        |
|          | 3fs | -haa      | -ha        | 1       | 1       | 0       | 1       | 1       | 1       |        |
|          | 1p  | -naa      | -na        | 1       | 1       | 0       | 1       | 1       | 1       |        |



|  |     |             |      |         |         |          |         |         |         |         |
|--|-----|-------------|------|---------|---------|----------|---------|---------|---------|---------|
|  | 2mp | -kum        | -kVm | 1       | 1       | 0        | 1       | 1       | 1       |         |
|  | 2fp | -kunna      | -kVm | 1       | .5      | 0        | 1       | 1       | 1       |         |
|  | 3mp | -hum        | -hVm | 1       | 1       | 0        | 1       | 1       | 1       |         |
|  | 3fp | -hunna      | -hVm | 1       | 1       | 0        | 1       | 1       | 1       |         |
|  |     |             |      | 0.78    | 0.83    | 0.48     | 0.87    | 0.7     | 0.72    |         |
|  |     | Proto-diaAr | CA   | 1.2     | 1.29    | Cyp Gulf | Bux Glf |         | Bux Ymn |         |
|  |     |             |      | Glf Ymn | Glf Nig | Gulf Cyp | Glf Bux | Ymn Nig | Ymn Bux | Ymn Cyp |

|          |     | CA          | Proto diaAr | Nig Cyp | Nig Bux | Cyp Bux | Cyp Nubi |
|----------|-----|-------------|-------------|---------|---------|---------|----------|
| pref.con | 1s  | ?a-         | (?)a-?      | 0       | 0       | 0       | 0        |
|          | 2ms | ta-         | tV-         | 1       | 1       | 1       | 0        |
|          | 2fs | ta-ii(na)   | tV-i        | 1       | .75     | .75     | 0        |
|          | 3ms | ya-         | yV-         | 1       | 0       | 0       | 0        |
|          | 3fs | ta-         | tV-         | 1       | 1       | 1       | 0        |
|          | 1p  | na-         | nV-?        | 1       | 1       | 1       | 0        |
|          | 2mp | ta-uu(na)   | tV-u        | 1       | .75     | .75     | 0        |
|          | 2fp | ta-na       | tV-an       | 1       | 1       | 0       | 0        |
|          | 3mp | ya-uu(na)   | yV-u        | .5      | 0       | 0       | 0        |
|          | 3fp | ya-na       | yV-an       | 0       | 0       | 0       | 0        |
| suf.con  | 1s  | -tu         | -t          | 1       | 1       | 1       | 0        |
|          | 2ms | -ta         | -t          | 1       | 1       | 1       | 0        |
|          | 2fs | -ti         | -ti         | 1       | 1       | 1       | 0        |
|          | 3ms | -a          | 0           | 1       | 1       | 1       | 0        |
|          | 3fs | -at         | -Vt         | 1       | 1       | 1       | 0        |
|          | 1p  | -naa        | -na         | 1       | 1       | 1       | 0        |
|          | 2mp | -tum        | -tu         | 1       | .5      | .5      | 0        |
|          | 2fp | -tunna      | -tu         | 0       | 1       | 0       | 0        |
|          | 3mp | -uu         | -u          | 1       | .5      | .5      | 0        |
|          | 3fp | -na         | -u          | 0       | 1       | 0       | 0        |
| vb.obj.  | 1s  | -nii        | -ni         | 0       | 1       | 0       | 1        |
|          | 2ms | -ka         | -ak         | 0       | 1       | 0       | 1        |
|          | 2fs | -ki         | -ik         | 0       | 1       | 0       | 0        |
|          | 3ms | -hu         | -hu         | 0       | 0       | 0       | 1        |
|          | 3fs | -haa        | -ha         | 0       | 1       | 0       | 0        |
|          | 1p  | -naa        | -na         | 0       | 1       | 0       | 0        |
|          | 2mp | -kum        | -kVm        | 0       | .5      | 0       | 0        |
|          | 2fp | -kunna      | -kVm        | 0       | 1       | 0       | 0        |
|          | 3mp | -hum        | -hVm        | 0       | 1       | 0       | 0        |
|          | 3fp | -hunna      | -hVm        | 0       | 1       | 0       | 0        |
|          |     |             |             | 0.52    | 0.77    | 0.38    | 0.1      |
|          |     | Proto-diaAr | CA          | Nig Cyp | Nig Bux | Cyp Bux | Cyp Nubi |

Note on Cyp-Nubi: While Cypriot has retained the verb-subject markers, like Nubi it has lost the verbal object clitics, replacing them with free standing pronouns. The form of these pronouns are not identical in the two varieties, having been shaped by different analogical processes. Nonetheless where the forms are similar this has been marked as an identity (score 1). As there are three such identities, the shared rate for Cyp-Nub is 10% (0.1).
