# Supplementary material
Source: publisher figshare collection journal article supplement (https://brill.figshare.com/articles/dataset/_/11688558)
Supplement: Supplementary file 4 [file 1]

# Appendix 3: Inflectional Morphology

Inflectional verbal morphology and verbal object clitics in Arabic dialects and CA.

data

|          |     | CA        | Proto-<br>diaAr | Mor | Mlt  | Cai  | Dms  | Skh    | Irq    | AqArb  | Gulf   | Ymn    | Cyp     | Bux    | Nig    | nubi   |
|----------|-----|-----------|-----------------|-----|------|------|------|--------|--------|--------|--------|--------|---------|--------|--------|--------|
| pref.con | 1s  | ʔa-       | (ʔ)a-ʔ          | n-  | ni-  | ʔa-  | 0    | a-     | a-     | a-     | a-     | ʔa-    | 0-      | ma-    | ba-    | ‘ana   |
|          | 2ms | ta-       | tV-             | t-  | ti-  | ti-  | tə-  | ti-    | te-    | tə-    | ta-    | tu-    | t/tt-   | tə-    | tV-    | ‘ita   |
|          | 2fs | ta-ii(na) | tV-i            | t-i | ti-  | ti-i | tə-i | ti-in  | te-iin | tə-iin | ta-iin | tu-i   | t/tt--i | tə-iin | tV-i   | ‘ita   |
|          | 3ms | ya-       | yV-             | y-  | yi-  | yi-  | yə-  | yi-    | ye-    | yə-    | ya-    | yu-    | y-      | mə-    | bi-    | ‘uo    |
|          | 3fs | ta-       | tV-             | t-  | ti-  | ti-  | tə-  | ti-    | te-    | tə-    | ta-    | tu-    | t/tt-   | tə-    | tV-    | ‘uo    |
|          | 1p  | na-       | nV-ʔ            | n-u | ni-u | ne-  | nə-  | ni-    | ne     | nə-    | na-    | nu-    | n-      | nə     | nV-    | ‘ina   |
|          | 2mp | ta-uu(na) | tV-u            | t-u | ti-u | ti-u | tə-u | ti-uun | te-uun | tə-uun | ta-uun | ta-u   | t/tt--u | tə-uun | tV-u/o | ‘itoku |
|          | 2fp | ta-na     | tV-an           | t-u | ti-u | ti-u | tə-u | ti-uun | te-uun | tə-uun | ta-an  | tu-ayn | t/tt--u | tə-in  | tV-an  | ‘itoku |
|          | 3mp | ya-uu(na) | yV-u            | y-u | yi-u | yi-u | yə-u | yi-uun | ye-uun | yə-uun | ya-uun | yu-u   | y--u    | mə-uun | bi-u/o | ‘umon  |
|          | 3fp | ya-na     | yV-an           | y-u | yi-u | yi-u | yə-u | yi-uun | ye-uun | yə-uun | ya-an  | yu-ayn | y--u    | mə-in  | bi—an  | ‘umon  |
| suf.con  | 1s  | -tu       | -t              | -t  | -t   | -t   | -t   | -t     | -t     | -tu    | -t     | -k     | -t      | -t     | -t     | ‘ana   |
|          | 2ms | -ta       | -t              | -ti | -t   | -t   | -t   | -t     | -t     | -t     | -t     | -k     | -t      | -t     | -t     | ‘ita   |
|          | 2fs | -ti       | -ti             | -ti | -t   | -ti  | -ti  | -ti    | -ti    | -ti    | -tʃ    | -ʃ     | -ti     | -tii   | -ti    | ‘ita   |
|          | 3ms | -a        | 0               | 0   | 0    | 0    | 0    | 0      | 0      | 0      | 0      | 0      | -0      | 0      | 0      | ‘uo    |
|          | 3fs | -at       | -Vt             | -it | -et  | -it  | -et  | -at    | -at    | -ət    | -at    | -at    | -it     | -it    | -at    | ‘uo    |
|          | 1p  | -naa      | -na             | -na | -na  | -na  | -na  | -na    | -na    | -na    | -na    | -na    | -na     | -naa   | -na    | ‘ina   |
|          | 2mp | -tum      | -tu             | -tu | -tu  | -tu  | -tu  | -tu    | -tu    | -təm   | -tu    | -kum   | -tu     | -tum   | -tu    | ‘itoku |
|          | 2fp | -tunna    | -tu             | -tu | -tu  | -tu  | -tu  | -tu    | -tu    | -təm   | -tin   | -kun   | -tu     | -tin   | -tan   | ‘itoku |
|          | 3mp | -uu       | -u              | -u  | -u   | -u   | -u   | -u     | -aw    | -u     | -aw    | -u     | -u      | -un    | -o     | ‘umon  |

|         |     |        |             |      |      |        |      |      |        |       |      |      |       |      |      |        |
|---------|-----|--------|-------------|------|------|--------|------|------|--------|-------|------|------|-------|------|------|--------|
|         | 3fp | -na    | -u          | -u   | -u   | -u     | -u   | -u   | -aw    | -u    | -an  | -an  | -u    | -in  | -an  | 'umon  |
| vb.obj. | 1s  | -nii   | -ni         | -ni  | -ni  | -ni    | -ni  | -ni  | -ni    | -ni   | -ni  | -niy | ana   | -nii | -ni  | 'ana   |
|         | 2ms | -ka    | -ak         | -k   | -ek  | -ak    | -ak  | -tʃ  | -ak    | -k    | -ak  | -ak  | int   | -ak  | -ak  | 'ita   |
|         | 2fs | -ki    | -ik         | -k   | -ek  | -ik    | -ik  | -tʃi | -k     | -ki   | -itʃ | -iʃ  | inti  | -kii | -ki  | 'ita   |
|         | 3ms | -hu    | -hu         | -h   | -h   | -u     | -h   | -u   | -u     | -hu   | -a   | -ih  | uo    | -h   | -a   | 'uo    |
|         | 3fs | -haa   | -ha         | -ha  | -ha  | -ha    | -ha  | -ha  | -ha    | -ha   | -ha  | -ha  | ie    | -aa  | -ha  | 'uo    |
|         | 1p  | -naa   | -na         | -na  | -na  | -na    | -na  | -na  | -na    | -na   | -ana | -na  | naxni | -naa | -na  | 'ina   |
|         | 2mp | -kum   | -kVm        | -kom | -kom | -ku(m) | -kon | -tʃu | -kem   | -kəm  | -kum | -kum | intu  | -kum | -ku  | 'itoku |
|         | 2fp | -kunna | -kVm        | -kom | -kom | -ku(m) | -kon | -tʃu | -kem   | -kəm  | -kin | -kin | intu  | -kin | -kan | 'itoku |
|         | 3mp | -hum   | -hVm        | -hom | -hom | -hum   | -hon | -ham | -(h)em | -həm  | -hum | -hum | innen | -hum | -hum | 'umon  |
|         | 3fp | -hunna | -hVm        | -hom | -hom | -hum   | -hon | -ham | -(h)em | -həm  | hin  | -hin | innen | -hin | -hin | 'umon  |
|         |     | CA     | Proto-diaAr | Mor  | Malt | Cai    | Dms  | Skn  | Irq    | AqArb | Ymn  | Glʃ  | Cyp   | Bux  | Nig  | Nubi   |

#### Evaluation of Cognacy: dialects and CA

Notes: only those parts of affix which indicate person/gender/number considered (thus CA ta-iina = da t-i), although in comparing dialects, forms differing only by the presence or absence of -n are rated .75

|          |     | Mor<br>CA | Mlt<br>CA | Cai<br>CA | Dms<br>CA | Skh<br>CA | Irq<br>CA | AqArb<br>CA | Gulf-<br>CA | Ymn<br>-CA | Cyp-<br>CA | Bux-<br>CA | Nig-<br>CA | nubi-<br>CA | stability<br>w/nubi | stability<br>w/o nubi |
|----------|-----|-----------|-----------|-----------|-----------|-----------|-----------|-------------|-------------|------------|------------|------------|------------|-------------|---------------------|-----------------------|
| pref.con | 1s  | 0         | 0         | 1         | 0         | 1         | 1         | 1           | 1           | 1          | 0          | 0          | 0          | 0           | 0.46                | 0.5                   |
|          | 2ms | 1         | 1         | 1         | 1         | 1         | 1         | 1           | 1           | 1          | 1          | 1          | 1          | 0           | 0.92                | 1                     |
|          | 2fs | 1         | .5        | 1         | 1         | 1         | 1         | 1           | 1           | 1          | 1          | 1          | 1          | 0           | 0.85                | 0.92                  |
|          | 3ms | 1         | 1         | 1         | 1         | 1         | 1         | 1           | 1           | 1          | 1          | 0          | 0          | 0           | 0.77                | 0.83                  |
|          | 3fs | 1         | 1         | 1         | 1         | 1         | 1         | 1           | 1           | 1          | 1          | 1          | 1          | 0           | 0.92                | 1                     |

|                |     |      |      |      |      |      |      |     |      |      |      |     |      |     |      |      |
|----------------|-----|------|------|------|------|------|------|-----|------|------|------|-----|------|-----|------|------|
|                | 1p  | .5   | .5   | 1    | 1    | 1    | 1    | 1   | 1    | 1    | 1    | 1   | 1    | 0   | 0.85 | 0.92 |
|                | 2mp | 1    | 1    | 1    | 1    | 1    | 1    | 1   | 1    | 1    | 1    | 1   | 1    | 0   | 0.9  | 0.98 |
|                | 2fp | 0    | 0    | 0    | 0    | 0    | 0    | 0   | 0    | 1    | 0    | 1   | 1    | 0   | 0.23 | 0.25 |
|                | 3mp | 1    | 1    | 1    | 1    | 1    | 1    | 1   | 1    | 1    | 1    | .5  | .5   | 0   | 0.85 | 0.92 |
|                | 3fp | 0    | 0    | 0    | 0    | 0    | 0    | 0   | 1    | 1    | 0    | .5  | .5   | 0   | 0.23 | 0.25 |
| suf.con        | 1s  | .5   | .5   | .5   | .5   | .5   | .5   | 1   | 1    | 0    | 1    | 1   | 1    | 0   | 0.62 | 0.67 |
|                | 2ms | .5   | .5   | .5   | .5   | .5   | .5   | 1   | 1    | 0    | 1    | 1   | 1    | 0   | 0.62 | 0.72 |
|                | 2fs | 1    | .5   | 1    | 1    | 1    | 1    | 1   | 1    | 0    | 1    | 1   | 1    | 0   | 0.81 | 0.88 |
|                | 3ms | 1    | 1    | 1    | 1    | 1    | 1    | 1   | 1    | 1    | 1    | 1   | 1    | 0   | 0.92 | 1    |
|                | 3fs | 1    | 1    | 1    | 1    | 1    | 1    | 1   | 1    | 1    | 0    | 1   | 1    | 0   | 0.92 | 1    |
|                | 1p  | 1    | 1    | 1    | 1    | 1    | 1    | 1   | 1    | 1    | 1    | 1   | 1    | 0   | 0.92 | 1    |
|                | 2mp | 1    | 1    | 1    | 1    | 1    | 1    | 1   | 1    | 0    | 1    | 1   | 1    | 0   | 0.85 | 0.92 |
|                | 2fp | 0    | 0    | 0    | 0    | 0    | 0    | 0   | 1    | 0    | 0    | 1   | 1    | 0   | 0.23 | 0.25 |
|                | 3mp | 1    | 1    | 1    | 1    | 1    | 1    | 1   | 1    | 1    | 1    | 1   | 1    | 0   | 0.92 | 1    |
|                | 3fp | 0    | 0    | 0    | 0    | 0    | 0    | 0   | 1    | 1    | 0    | 1   | 1    | 0   | 0.38 | 0.42 |
| vb.obj.        | 1s  | 1    | 1    | 1    | 1    | 1    | 1    | 1   | 1    | 1    | 0    | 1   | 1    | 0   | 0.85 | 0.92 |
|                | 2ms | .5   | .5   | .75  | .75  | .5   | .75  | 1   | .5   | 1    | 0    | 1   | 1    | 0   | 0.63 | 0.69 |
|                | 2fs | .5   | .5   | .75  | .75  | 1    | .5   | 1   | .5   | 1    | 0    | 1   | 1    | 0   | 0.65 | 0.71 |
|                | 3ms | 1    | 1    | 1    | 1    | 1    | 1    | 1   | 0    | 1    | 0    | 1   | 0    | 0   | 0.69 | 0.75 |
|                | 3fs | 1    | 1    | 1    | 1    | 1    | 1    | 1   | 1    | 1    | 0    | 1   | 1    | 0   | 0.85 | 0.92 |
|                | 1p  | 1    | 1    | 1    | 1    | 1    | 1    | 1   | 1    | 1    | 0    | 1   | 1    | 0   | 0.85 | 0.92 |
|                | 2mp | 1    | 1    | 1    | 0    | 1    | 1    | 1   | 1    | 1    | 0    | 1   | 1    | 0   | 0.77 | 0.83 |
|                | 2fp | 0    | 0    | 0    | 1    | 0    | 0    | 0   | .5   | 1    | 0    | 1   | 1    | 0   | 0.35 | 0.38 |
|                | 3mp | 1    | 1    | 1    | 0    | 1    | 1    | 1   | 1    | 1    | 0    | 1   | 1    | 0   | 0.77 | 0.83 |
|                | 3fp | 0    | 0    | 0    | 1    | 0    | 0    | 0   | .5   | 1    | 0    | 1   | 1    | 0   | 0.35 | 0.38 |
| Avg. retention |     | 0.68 | 0.65 | 0.75 | 0.72 | 0.75 | 0.74 | 0.8 | 0.87 | 0.83 | 0.47 | 0.9 | 0.87 | 0.0 | 0.69 | 0.75 |

|         |  |           |           |           |           |            |           |             |         |            |        |           |            |             |                   |                    |
|---------|--|-----------|-----------|-----------|-----------|------------|-----------|-------------|---------|------------|--------|-----------|------------|-------------|-------------------|--------------------|
| 1.4 rt. |  | .76       | .73       | .81       | .78       | .81        | .80       | .85         | .90     | .87        | .58    | .92       | .90        | .0          | 0.75              | 0.81               |
|         |  | Mor<br>CA | Mlt<br>CA | Cai<br>CA | Dms<br>CA | Skh-<br>CA | Irq<br>CA | AqArb<br>CA | Gulf-CA | Ymn<br>-CA | Cyp-CA | Bux<br>CA | Nig-<br>CA | nubi-<br>CA | avg ret<br>w/nubi | avg.ret w/<br>nubi |

Avg. full time w/Nubi 69; range 90-0=90 avg.

full time w/o Nubi 75; range 90-47=43

avg/mill w/Nubi 75; range 92-0=92 avg/mill

w/o Nubi 81; range 92-58=32
