# Supplementary material
Source: publisher figshare collection journal article supplement (https://brill.figshare.com/articles/dataset/_/11688558)
Supplement: Supplementary file 5 [file 1]

## Appendix 4: Morphosyntax

### 25 Morphosyntactic features for comparison:

1-7 basic word order patterns S&V, O&V; N&A, N&G, N&Rel, N&Dem; Prep or Post

8 definite article: present or absent, preposed or postposed

9 morphological marking of verb argument cases (nominative, accusative, dative)

10 form of genitive phrase

11 gender markers: present or absent, if present how many

12-14 the form of copular, existential, and existential-relational ("have") expressions

15 TAM particles: present or absent

16 Auxiliaries: present or absent, how construed 17 position of verbal negation

18 verb in complement clauses: inflected or infinitive

19 presence/absence of productive infinitive

20 V in coordinate clauses: converb or fully inflected V

21 NP vs. VP coordination: same linking particle or different 22 Relative clause marking: rel verb form, rel. pro, or zero 23 presence or absence of productive act. participle

24 Q particle in yes/no questions: present or absent, where positioned

25 position of wh-pronoun in wh-questions

### Data comparison

|   |               | CA                      | M<br>or      | Mlt      | Cai      | Dm<br>s  | Skh      | Irq      | Aq<br>Arb       | Glif                 | Ym<br>n               | Cyp       | Bux               | Nig      | nub<br>i |
|---|---------------|-------------------------|--------------|----------|----------|----------|----------|----------|-----------------|----------------------|-----------------------|-----------|-------------------|----------|----------|
| 1 | V&S           | VS                      | VS           | SV       | VS       | VS       | SV       | VS       | VS              | SV                   | SV                    | VS        | SV                | VS       | SV       |
| 2 | V&O           | V<br>O                  | V<br>O       | VO       | VO       | VO       | VO       | VO       | VO              | VO                   | VO                    | VO        | OV                | VO       | VO       |
| 3 | N&A           | N<br>A                  | N<br>A       | NA       | NA       | NA       | NA       | NA       | NA              | NA                   | NA                    | NA,<br>AN | N-<br>n-A         | NA       | NA       |
| 4 | N&G           | N<br>G                  | N<br>G       | NG       | NG       | NG       | NG       | NG       | NG              | NG                   | NG                    | NG        | NG,<br>GN-<br>pro | NG       | NG       |
| 5 | N&Rel         | N<br>R                  | N<br>R       | NR       | NR       | NR       | NR       | NR       | NR              | NR                   | NR                    | NR        | RN                | NR       | NR<br>el |
| 6 | Prep/P<br>ost | Pr<br>ep                | Pr<br>ep     | Pre<br>p | Pr<br>ep | Pre<br>p | Pre<br>p | Pre<br>p | Pre<br>p        | Pre<br>p             | Pre<br>p              | Pre<br>p  | Pre<br>p          | pre<br>p | Pre<br>p |
| 7 | N&De<br>m     | De<br>m<br>D<br>A-<br>N | De<br>m<br>N | De<br>mN | Nd<br>em | De<br>mN | ND<br>em | De<br>mN | De<br>mD<br>A-N | De<br>m-<br>DA-<br>N | De<br>mN<br>,ND<br>em | De<br>mN  | De<br>mN          | ND<br>em | Nd<br>em |

|    |                                                                |                                        |                                        |                    |                                                 |                                |                        |                         |                                  |                          |                                |                                       |                                         |                                                  |                                 |
|----|----------------------------------------------------------------|----------------------------------------|----------------------------------------|--------------------|-------------------------------------------------|--------------------------------|------------------------|-------------------------|----------------------------------|--------------------------|--------------------------------|---------------------------------------|-----------------------------------------|--------------------------------------------------|---------------------------------|
| 8  | def art                                                        | D<br>A-<br>N<br>(D<br>A-<br>A)         | D<br>A-<br>N<br>(d<br>a-<br>A)         | DA-<br>N<br>(A)    | DA<br>-N<br>(D<br>A-<br>A)                      | DA-<br>N<br>(DA-<br>A)         | DA<br>N                | DA-<br>N<br>(DA<br>-A)  | DA-<br>N(D<br>A)A                | DA<br>N                  | DA-<br>N                       | DA-<br>N(D<br>A-<br>A),<br>DA-<br>A-N | no<br>DA                                | DA-<br>N(D<br>A-<br>A)                           | NP-<br>DA                       |
| 9  | morph<br>marking of<br>arg<br>cases                            | N<br>O<br>M,<br>AC<br>C                | N<br>oC<br>as<br>e                     | NoC<br>ase         | No<br>Ca<br>se                                  | No<br>Cas<br>e                 | No<br>Cas<br>e         | No<br>Cas<br>e          | No<br>Cas<br>e                   | No<br>Cas<br>e           | No<br>Cas<br>e                 | Acc<br>. l-                           | no<br>cas<br>e, o<br>pt.<br>AC<br>C il- | No<br>Cas<br>e,<br>opt<br>.Ac<br>c<br>le-,<br>fi | No<br>Cas<br>e                  |
| 10 | gen<br>phrase<br>gp=<br>gen<br>particl<br>e<br>gc=ge<br>n case | N<br>G-<br>gc                          | N<br>gp<br>-<br>G,<br>N<br>G           | N<br>gp-<br>G      | N<br>gp-<br>G,<br>NG                            | NG,<br>N<br>gp-<br>G           | N-<br>gp-<br>G, N<br>G | NG,<br>N<br>gp-<br>G    | N-<br>gp-<br>G<br>DA<br>ND<br>AG | NG,<br>N-<br>gp-<br>G    | NG<br>(N-<br>gp-<br>G)         | N-<br>gp-<br>G,<br>N-<br>pro<br>-G    | NG,<br>N-<br>gp-<br>G,<br>GN-<br>Pro    | NG,<br>N--<br>gp-<br>-G                          | N-<br>gp-<br>G                  |
| 11 | gram<br>matical<br>gender                                      | 2G<br>nd                               | 2G<br>nd                               | 2Gn<br>d           | 2G<br>nd                                        | 2G<br>nd                       | 2G<br>nd               | 2G<br>nd                | 2G<br>nd                         | 2G<br>nd                 | 2G<br>nd                       | 2G<br>nd                              | 2G<br>nd                                | 2G<br>nd                                         | no<br>Gn<br>d                   |
| 12 | copula<br>, V or<br>other                                      | ju<br>xt.<br>,<br>pr<br>on<br>.c<br>op | ju<br>xt.<br>,<br>pr<br>on<br>.c<br>op |                    | jux<br>t.,<br>par<br>ticl<br>e<<br>V<br>co<br>p | juxt<br>.,<br>pro<br>n.c<br>op | juxt<br>.              | juxt<br>.               | pro<br>n.<br>cop                 | juxt                     | juxt<br>,pr<br>on<br>cop<br>.. | pro<br>n.<br>cop                      | V                                       | juxt<br>.                                        | juxt<br>.,V(<br>kan<br>kun<br>) |
| 13 | existe<br>ntial, V<br>or<br>other                              | no<br>nV<br>ex<br>ist                  | Ve<br>xis<br>t                         | Vexi<br>st         | par<br>tfi<br>exi<br>st                         | non<br>V<br>exis<br>t          | par<br>t bi            | par<br>ticl<br>e<br>aku | par<br>ticl<br>e<br>exis<br>t    | par<br>t fi              | par<br>t fi                    | par<br>t fi                           | Vex<br>ist                              | par<br>t fi<br>exis<br>t                         | non<br>Vex<br>ist,fi            |
| 14 | existe<br>ntial-<br>relatio<br>nal<br>"have"                   | pr<br>ep<br>-<br>pr<br>o               | pr<br>ep<br>-<br>pr<br>o               | Vexi<br>st-<br>pro | pr<br>ep-<br>pr<br>o                            | pre<br>p-<br>pro               | pre<br>p-<br>pro       | pre<br>p-<br>pro        | Vha<br>veV<br>-<br>pos<br>ses    | pre<br>p'in<br>d-<br>pr0 | pre<br>p(l)<br>-<br>pro        | pre<br>p<br>(li)-<br>pro<br>;pa       | pre<br>p-<br>pro                        | pre<br>p-<br>pro                                 | V(e<br>ndu<br>,en<br>du)        |

|        |                                                                |                                  |                     |               |                     |                     |                               |                                 |                     |                                         |                     |                              |                                                             |                                                                          |                                               |
|--------|----------------------------------------------------------------|----------------------------------|---------------------|---------------|---------------------|---------------------|-------------------------------|---------------------------------|---------------------|-----------------------------------------|---------------------|------------------------------|-------------------------------------------------------------|--------------------------------------------------------------------------|-----------------------------------------------|
|        |                                                                |                                  |                     |               |                     |                     |                               |                                 | sor                 |                                         |                     | st<br>kall<br>u              |                                                             |                                                                          |                                               |
| 1<br>5 | TAM<br>particl<br>es                                           | no<br>TA<br>,M<br>su<br>ffi<br>x | pr<br>eV<br>TA<br>M | no<br>TA<br>M | pr<br>eV<br>TA<br>M | pre<br>V<br>TA<br>M | pre<br>V<br>TA<br>M           | pre<br>V<br>TA<br>M             | pre<br>V<br>TA<br>M | 0,p<br>ref<br>TA<br>M<br>bi<br>rar<br>e | pre<br>f<br>TA<br>M | pre<br>f<br>TA<br>M          | pre<br>.mi<br>=pr<br>es.<br>par<br>t+n<br>+pr<br>o=p<br>erf | par<br>t-n-<br>pro<br>=pr<br>es/<br>hab<br>it,b<br>-<br>pre<br>s.in<br>d | pre<br>V<br>TA<br>M<br>or<br>adv              |
| 1<br>6 | inflect<br>ed aux<br>domin<br>ating<br>inflect<br>ed<br>main V | N<br>oA<br>ux                    | N<br>oA<br>ux       | NoA<br>ux     | No<br>Au<br>x       | No<br>Aux           | No<br>Aux<br>, ex<br>kaa<br>n | No<br>Aux<br>, ex.t<br>jaa<br>n | No<br>Aux           | No<br>Aux                               | No<br>Aux<br>?      | No<br>Aux<br>ex.<br>kaa<br>n | par<br>t<br>aux<br>do<br>m.i<br>nfl<br>V                    | No<br>Aux                                                                | Aux<br>kan<br>,ru<br>a                        |
| 1<br>7 | positio<br>n of<br>verbal<br>negati<br>on                      | nV                               | nV<br>n             | nVn           | nV<br>n             | nV                  | nV,<br>nV<br>n                | nV                              | nV                  | nV                                      | nV<br>n             | nV                           | nV                                                          | nV                                                                       | nV,<br>sen<br>t<br>fina<br>l,va<br>riab<br>le |
| 1<br>8 | V in<br>comp<br>clause<br>s, inf<br>or<br>inflect<br>edV       | Co<br>m<br>pV                    | Co<br>m<br>pV       | Co<br>mp<br>V | Co<br>mp<br>V       | Co<br>mp<br>V       | Co<br>mp<br>V                 | Co<br>mp<br>V                   | Co<br>mp<br>V       | Co<br>mp<br>V                           | Co<br>mp<br>V       | Co<br>mp<br>V                | inf<br>Co<br>mp                                             | Co<br>mp<br>V                                                            | Co<br>mp<br>bar<br>eV                         |
| 1<br>9 | produc<br>tive<br>inf/<br>non-<br>prod<br>VN                   | Vn                               | vn                  | vn            | vn                  | vn                  | vn?                           | vn                              | vn                  | vn?                                     | vn                  | vn                           | pro<br>d.in<br>f                                            | vn                                                                       | pro<br>d.v<br>n &<br>inf                      |
| 2<br>0 | V in<br>coordi<br>nate                                         | ful<br>lV                        | ful<br>lV           | full<br>V     | full<br>V           | full<br>V           | full<br>V                     | full<br>V                       | full<br>V           | full<br>V                               | full<br>V?          | full<br>V                    | full<br>V<br>(or                                            | full<br>V                                                                | bar<br>eV                                     |

|        |                                                            |                                     |                                     |                                 |                                     |                                 |                                 |                                 |                                 |                                 |                                         |                                 |                          |                          |                                |
|--------|------------------------------------------------------------|-------------------------------------|-------------------------------------|---------------------------------|-------------------------------------|---------------------------------|---------------------------------|---------------------------------|---------------------------------|---------------------------------|-----------------------------------------|---------------------------------|--------------------------|--------------------------|--------------------------------|
|        | clause<br>s:<br>conver<br>b or<br>fully<br>inflect<br>ed V |                                     |                                     |                                 |                                     |                                 |                                 |                                 |                                 |                                 |                                         |                                 | par<br>t)                |                          |                                |
| 2<br>1 | NP vs.<br>VP<br>coordi<br>nation                           | sa<br>m<br>e<br>co<br>N<br>P/<br>VP | sa<br>m<br>e<br>co<br>N<br>P/<br>VP | sa<br>m<br>e<br>co<br>NP/<br>VP | sa<br>m<br>e<br>co<br>NP/<br>V<br>P | sa<br>m<br>e<br>co<br>NP/<br>VP | sa<br>m<br>e<br>co<br>NP/<br>VP | sa<br>m<br>e<br>co<br>NP/<br>VP | sa<br>m<br>e<br>co<br>NP/<br>VP | sa<br>m<br>e<br>co<br>NP/<br>VP | sa<br>m<br>e<br>co<br>NP/<br>VP         | sa<br>m<br>e<br>co<br>NP/<br>VP | Nw<br>N<br>VO<br>V       | Nh<br>aw<br>N,V<br>OV    | Nm<br>aN,<br>Vw<br>aV          |
| 2<br>2 | Rel<br>marke<br>r                                          | Re<br>l<br>Pro<br>o                 | Re<br>l<br>Pro<br>o                 | Rel<br>Pro                      | Rel<br>Pro<br>o                     | Rel<br>Pro                      | Rel<br>Pro                      | Rel<br>Pro                      | Rel<br>pro                      | Rel<br>Pro                      |                                         | Rel<br>Pro<br>ta                | Rel<br>pro<br>,0         | Rel<br>Pro               | Rel<br>pro                     |
| 2<br>3 | produc<br>tive<br>active<br>partici<br>ple                 | pr<br>od<br>. Ap                    | pr<br>od<br>. ap                    | pro<br>d.<br>Ap                 | pr<br>od.<br>ap                     | pro<br>d.<br>ap                 | pro<br>d<br>ap                  | pro<br>d.<br>ap                 | pro<br>d<br>ap                  | pro<br>d<br>ap                  | pro<br>d<br>ap                          | pro<br>d<br>ap                  | pro<br>d.a<br>p          | pro<br>d<br>ap           | no<br>ap?                      |
| 2<br>4 | Q-<br>particl<br>e in<br>yes/no<br>Qs                      | Q<br>P-<br>ini<br>tial              | Q<br>P-<br>ini<br>tial              |                                 | no<br>QP                            | no<br>QP                        | pos<br>tVQ<br>P-<br>sh          | no<br>QP                        | no<br>QP                        | no<br>QP                        | no<br>QP                                | no<br>QP                        | QP-<br>fina<br>l         | QP-<br>fina<br>l -<br>wa | no<br>Q<br>P,in<br>ton<br>only |
| 2<br>5 | wh-<br>positio<br>n                                        | w<br>h-<br>ini<br>tial              | w<br>h-<br>ini<br>tial              | wh-<br>initi<br>al              | wh-<br>fin<br>al                    | wh-<br>initi<br>al              | wh-<br>initi<br>al              | wh-<br>initi<br>al              | wh-<br>initi<br>al              | wh-<br>initi<br>al              | wh-<br>initi<br>al,o<br>r<br>pos<br>t-V | wh-<br>initi<br>al              | wh-<br>pre<br>ver<br>bal | wh-<br>in<br>situ        | wh<br>in<br>situ               |
|        |                                                            | CA                                  | M<br>or                             | Mlt                             | Cai                                 | Dm<br>s                         | Skh                             | Irq<br>Ar                       | Aq<br>Arb                       | Gul<br>f                        | Ym<br>n                                 | Cyp                             | Bux                      | Nig                      | nub<br>i                       |
|        |                                                            | CA<br>av<br>g.                      |                                     |                                 |                                     |                                 |                                 |                                 | Irq<br>Ar                       |                                 |                                         |                                 |                          |                          |                                |

Evaluation of identities between CA and dialects

|  |     |   |   |   |   |   |    |   |   |   |    |   |   |       |   |
|--|-----|---|---|---|---|---|----|---|---|---|----|---|---|-------|---|
|  | CA- | C | C | C | C | C | CA | C | C | C | CA | C | C | proto | C |
|--|-----|---|---|---|---|---|----|---|---|---|----|---|---|-------|---|

|    |                                                                 | Mo<br>r | A<br>M<br>lt | A<br>C<br>ai | A-<br>D<br>m<br>s | A-<br>Sk<br>h | A<br>lr<br>q | -<br>Aq<br>Ar | A<br>Gl<br>f | A-<br>Y<br>m<br>n | A<br>Cy<br>p | Bu<br>x | A<br>Ni<br>g | A<br>n<br>u<br>bi | -DA                   | A-<br>P<br>D<br>A |
|----|-----------------------------------------------------------------|---------|--------------|--------------|-------------------|---------------|--------------|---------------|--------------|-------------------|--------------|---------|--------------|-------------------|-----------------------|-------------------|
| 1  | V&S                                                             | 1       | 0            | 1            | 1                 | 0             | 1            | 1             | 0            | 0                 | 1            | 0       | 1            | 0                 | VS                    | 1                 |
| 2  | V&O                                                             | 1       | 1            | 1            | 1                 | 1             | 1            | 1             | 1            | 1                 | 1            | 0       | 1            | 1                 | VO                    | 1                 |
| 3  | N&A                                                             | 1       | 1            | 1            | 1                 | 1             | 1            | 1             | 1            | 1                 | 1            | 0       | 1            | 1                 | NA                    | 1                 |
| 4  | N&G                                                             | 1       | 1            | 1            | 1                 | 1             | 1            | 1             | 1            | 1                 | .5           | 1       | 1            | 1                 | NG                    | 1                 |
| 5  | N&Rel                                                           | 1       | 1            | 1            | 1                 | 1             | 1            | 1             | 1            | 1                 | 1            | 0       | 1            | 1                 | NR                    | 1                 |
| 6  | Prep/P<br>ost                                                   | 1       | 1            | 1            | 1                 | 1             | 1            | 1             | 1            | 1                 | 1            | 0       | 1            | 1                 | Prep                  | 1                 |
| 7  | N&De<br>m                                                       | 1       | 1            | 0            | 1                 | 0             | 1            | 1             | 1            | .5                | 1            | 1       | 1            | 0                 | Dem-<br>N             | 1                 |
| 8  | def art                                                         | 1       | .5           | 1            | 1                 | 1             | 1            | 1             | 1            | 1                 | 1            | 1       | 0            | 0                 | da-N                  | 1                 |
| 9  | morph<br>marking of V<br>arg<br>cases                           | 0       | 1            | 0            | 0                 | 0             | 1            | 0             | 0            | 0                 | .5           | 0       | 1            | 0                 | NoCa<br>se            | 0                 |
| 10 | gen<br>phrase<br>gp:<br>gen<br>particl<br>e<br>gc: gen<br>case  | 0       | 0            | 0            | 0                 | .5            | 0            | 0             | .5           | 1                 | 0            | 0       | 0            | 0                 | NG?                   | .5                |
| 11 | gramm<br>atical<br>gender                                       | 1       | 1            | 1            | 1                 | 1             | 0            | 1             | 1            | 1                 | 0            | 0       | .5           | 0                 | 2Gnd                  | 1                 |
| 12 | copula,<br>V or<br>other                                        | 1       | 1            | .5           | 1                 | 1             | 1            | 1             | 1            | 1                 | 1            | 1       | 1            | 1                 | juxt.,<br>pron.<br>co | 1                 |
| 13 | existen<br>tial, V<br>or<br>other                               | 0       | 1            | 1            | 1                 | 1             | 1            | 0             | 1            | 1                 | .5           | 1       | 1            | 1                 | nonV<br>exist         | 1                 |
| 14 | existen<br>tial-<br>relatio<br>nal<br>“have”<br>: V or<br>other | 1       | 0            | 1            | 1                 | 1             | 0            | 0             | 1            | 1                 | 1            | 0       | 0            | 0                 | prep-<br>pro          | 1                 |

|    |                                                        |   |   |   |   |    |   |   |    |   |   |    |   |    |                |   |
|----|--------------------------------------------------------|---|---|---|---|----|---|---|----|---|---|----|---|----|----------------|---|
| 15 | TAM particles                                          | 0 | 1 | 0 | 0 | 0  | 1 | 0 | .5 | 0 | 1 | 1  | 1 | 0  | no TAM?        | 1 |
| 16 | inflected auxiliary dominating inflected main V        | 1 | 1 | 1 | 1 | 1  | 0 | 1 | 1  | 1 | 0 | 0  | 0 | 0  | NoAux          | 1 |
| 17 | position of verbal negation                            | 0 | 0 | 0 | 1 | .5 | 1 | 1 | 1  | 0 | 1 | 0  | 1 | .5 | nV             | 1 |
| 18 | V in complement clauses, inf or inflected V            | 1 | 1 | 1 | 1 | 1  | 1 | 1 | 1  | 1 | 1 | 1  | 1 | 0  | CompV          | 1 |
| 19 | productive inf/non-prod VN                             | 1 | 1 | 1 | 1 | 1  | 1 | 1 | 1  | 1 | 1 | 0  | 1 | 0  | vn             | 1 |
| 20 | V in coordinate clauses : converb or fully inflected V | 1 | 1 | 1 | 1 | 1  | 1 | 1 | 1  | 1 | 1 | 0  | 1 | 0  | full V         | 1 |
| 21 | NP vs. VP coordination                                 | 1 | 1 | 1 | 1 | 1  | 1 | 1 | 1  | 1 | 1 | 1  | 1 | 0  | same co NP/V P | 1 |
| 22 | Rel marker                                             | 1 | 1 | 1 | 1 | 1  | 1 | 1 | 1  | 1 | 1 | 0  | 0 | 1  | Rel Pro        | 1 |
| 2  | produc                                                 | 1 | 1 | 1 | 1 | 1  | 1 | 1 | 1  | 1 | 1 | .5 | 1 | 0  | prod.          | 1 |

|        |                                       |               |                    |                        |                        |                    |                    |                     |                         |                        |                   |               |                   |                         |                |                        |
|--------|---------------------------------------|---------------|--------------------|------------------------|------------------------|--------------------|--------------------|---------------------|-------------------------|------------------------|-------------------|---------------|-------------------|-------------------------|----------------|------------------------|
| 3      | tive<br>active<br>partici<br>ple      |               |                    |                        |                        |                    |                    |                     |                         |                        |                   |               |                   |                         | Ap             |                        |
| 2<br>4 | Q-<br>particl<br>e in<br>yes/no<br>Qs | 1             | 0                  | 0                      | 0                      | 0                  | 1                  | 0                   | 0                       | 0                      | 1                 | 1             | 1                 | 0                       | noQP           | 0                      |
| 2<br>5 | wh-<br>positio<br>n                   | 1             | 1                  | 0                      | 1                      | 1                  | 0                  | 1                   | 1                       | .5                     | 0                 | 0             | 0                 | 0                       | wh-<br>initial | 1                      |
|        | %retai<br>ned                         | 0.8<br>6      | 0.<br>78           | 0.<br>7                | 0.<br>84               | 0.<br>76           | 0.<br>76           | 0.<br>76            | 0.<br>84                | 0.<br>76               | 0.<br>78          | 0.4           | 0.<br>74          | 0.<br>34                | 0.72           | 0.<br>9                |
|        |                                       | .90           | .8<br>4            | .7<br>7                | .8<br>8                | .8<br>2            | .8<br>2            | .8<br>2             | .8<br>8                 | .8<br>2                | .8<br>4           | .51           | .8<br>1           | .4<br>6                 | 0.78           |                        |
|        |                                       | CA<br>Mo<br>r | C<br>A-<br>M<br>lt | C<br>A<br>-<br>C<br>ai | C<br>A-<br>D<br>m<br>s | C<br>A-<br>Sk<br>h | C<br>A-<br>lr<br>q | CA<br>-<br>Aq<br>Ar | C<br>A-<br>G<br>ul<br>f | C<br>A-<br>Y<br>m<br>n | C<br>A<br>Cy<br>p | CA<br>Bu<br>x | C<br>A<br>Ni<br>g | C<br>A-<br>n<br>u<br>bi | PDA            | C<br>A-<br>P<br>D<br>A |

Only one feature [Prep] is retained in all dialects retention rates for 25 morphosyntactic features

for full time avg. ret of 72, range 86-34=52, for 1 mill avg. ret. of 78, range 90-46=44
