# Supplementary material
Source: publisher figshare collection journal article supplement (https://brill.figshare.com/articles/dataset/_/11688558)
Supplement: Supplementary file 6 [file 1]

## Appendix 2: Phonology

Consonant correspondences across 13 Arabic dialects, Classical Arabic and reconstructed Proto-dialectal Arabic

## Data

[illegible]



|               |   |                                 |  |                   |                   |                 |                       |                    |                   |          |                   |                       |                       |                   |                   |            |      |
|---------------|---|---------------------------------|--|-------------------|-------------------|-----------------|-----------------------|--------------------|-------------------|----------|-------------------|-----------------------|-----------------------|-------------------|-------------------|------------|------|
| l             | l | 1                               |  | 1                 | 1                 | 1               | 1                     | 1                  | 1                 | 1        | 1                 | 1                     | 1                     | 1                 | 1                 | 1          | 1    |
| j             | j | 1                               |  | 1                 | 1                 | 1               | 1                     | 1                  | 1                 | 1        | 1                 | 1                     | 1                     | 1                 | 1                 | 1          | 1    |
| av<br>g.      |   | 0.93                            |  | 0.<br>79          | 0.<br>68          | 0.<br>79        | 0.<br>79              | 0.<br>86           | 0.<br>88          | 0.7<br>9 | 0.<br>88          | 0.<br>89              | 0.<br>5               | 0.<br>71          | 0.<br>63          | 0.5<br>2   | 0.75 |
| 1.<br>4<br>rt |   |                                 |  | .8<br>4           | .7<br>6           | .8<br>4         | .8<br>4               | .9<br>0            | .9<br>1           | .84      | .9<br>1           | .9<br>2               | .6<br>1               | .7<br>8           | .7<br>4           | .63        | 0.81 |
|               |   | accu<br>racy<br>of<br>reco<br>n |  | M<br>or<br>C<br>A | M<br>al<br>C<br>A | Ca<br>iro<br>CA | D<br>m<br>s<br>C<br>A | Sk<br>h-<br>C<br>A | lr<br>q<br>C<br>A | AA<br>CA | Gl<br>f<br>C<br>A | Y<br>m<br>n<br>C<br>A | C<br>y<br>p<br>C<br>A | Bu<br>x<br>C<br>A | Ni<br>g<br>C<br>A | Nub<br>iCA | Avg. |

for an avg. ret rate/total time of 75%, range 89-50=39, for 1 mill (1.4 root) avg. 81%, range 92-61=31

avg. expected shared rate after passage of 1.4 mill is 56, but in fact the range is between 45 and 97, avg. 72, so 18% of the shared items, or 5 consonants should be due to shared innovation, diffusion or drift.
